# Supplementary material for: Antibiotic resistance in European wastewater treatment plants mirrors the pattern of clinical antibiotic resistance prevalence
Source: PubMed Central journal article supplement (PMC6436925; doi:10.1126/sciadv.aau9124), 2019-03-27
Supplement: aau9124_SM.pdf [file aau9124_SM.pdf]

## Supplementary Materials for

### Antibiotic resistance in European wastewater treatment plants mirrors the pattern of clinical antibiotic resistance prevalence

Katariina M. M. Pärnänen, Carlos Narciso-da-Rocha, David Kneis, Thomas U. Berendonk, Damiano Cacace, Thi Thuy Do, Christian Elpers, Despo Fatta-Kassinos, Isabel Henriques, Thomas Jaeger, Antti Karkman, Jose Luis Martinez, Stella G. Michael, Irene Michael-Kordatou, Kristin O'Sullivan, Sara Rodriguez-Mozaz, Thomas Schwartz, Hongjie Sheng, Henning Sørum, Robert D. Stedtfeld, James M. Tiedje, Saulo Varela Della Giustina, Fiona Walsh, Ivone Vaz-Moreira, Marko Virta\*, Célia M. Manaia\*

\*Corresponding author. Email: cmanaia@porto.ucp.pt (C.M.M.); marko.virta@helsinki.fi (M.V.)

Published 27 March 2019, *Sci. Adv.* 5, eaau9124 (2019)

DOI: 10.1126/sciadv.aau9124

#### The PDF file includes:

Fig. S1. Average richness values (number of positive assays) for the different influent and effluent wastewater samples from high ( $H_{AC}$ ) and low ( $L_{AC}$ ) antibiotic consumption countries, for resistance genes and mobile genetic elements.

Fig. S2. Food-producing animals' antibiotics consumption [expressed in biomass (mg/kg), values for 2013] and average maximal and minimal annual temperature and precipitation (yellow, average  $T_{min} > 6^{\circ}C$ ; blue, average  $T_{max} < 5^{\circ}C$ ).

Fig. S3. Average abundance (copies/ml; upper bars; left-hand legend) and prevalence values (gene copies/16S rRNA gene copies; lower bars; right-hand legend) for the different influent (Inf) and effluent (Eff) wastewater samples from high ( $H_{AC}$ ) and low ( $L_{AC}$ ) antibiotic consumption countries, determined on the basis of qPCR array for the genes: 16S rRNA, *int11*, *bla<sub>OXA</sub>*, *sull*, *tetM*, *ermF*, *aadA*, *tnpA*, and *qacEdelta1*.

Fig. S4. Average abundance (copies/ml; upper bars; left-hand legend) and prevalence values (gene copies/16S rRNA copies; lower bars; right-hand legend) calculated by traditional real-time qPCR and qPCR array for Portuguese influent and effluent wastewater samples.

Table S1. Influent and effluent wastewater samples used in the study.

Table S2. qPCR primer sets and the percentage of samples that gave positive results for the influent and effluent wastewater samples.

Table S3. Consumption of antibacterials for systemic use (ATC group J01) in the community (primary care sector) in different European countries from 2005 to 2015 (see also Fig. 1), defined as daily dose per 1000 inhabitants and per day.

Table S4. Characterization of the UWTPs examined in this study, in terms of dimension, geographic conditions, treatment, and microbiological indicators.

Reference (32)

**Other Supplementary Material for this manuscript includes the following:**

(available at [advances.sciencemag.org/cgi/content/full/5/3/eaau9124/DC1](https://advances.sciencemag.org/cgi/content/full/5/3/eaau9124/DC1))

Data file S1. (.csv format). qPCR array data.

Data file S2. (.csv format). List of samples.

Data file S3. (.csv format). List of assays.

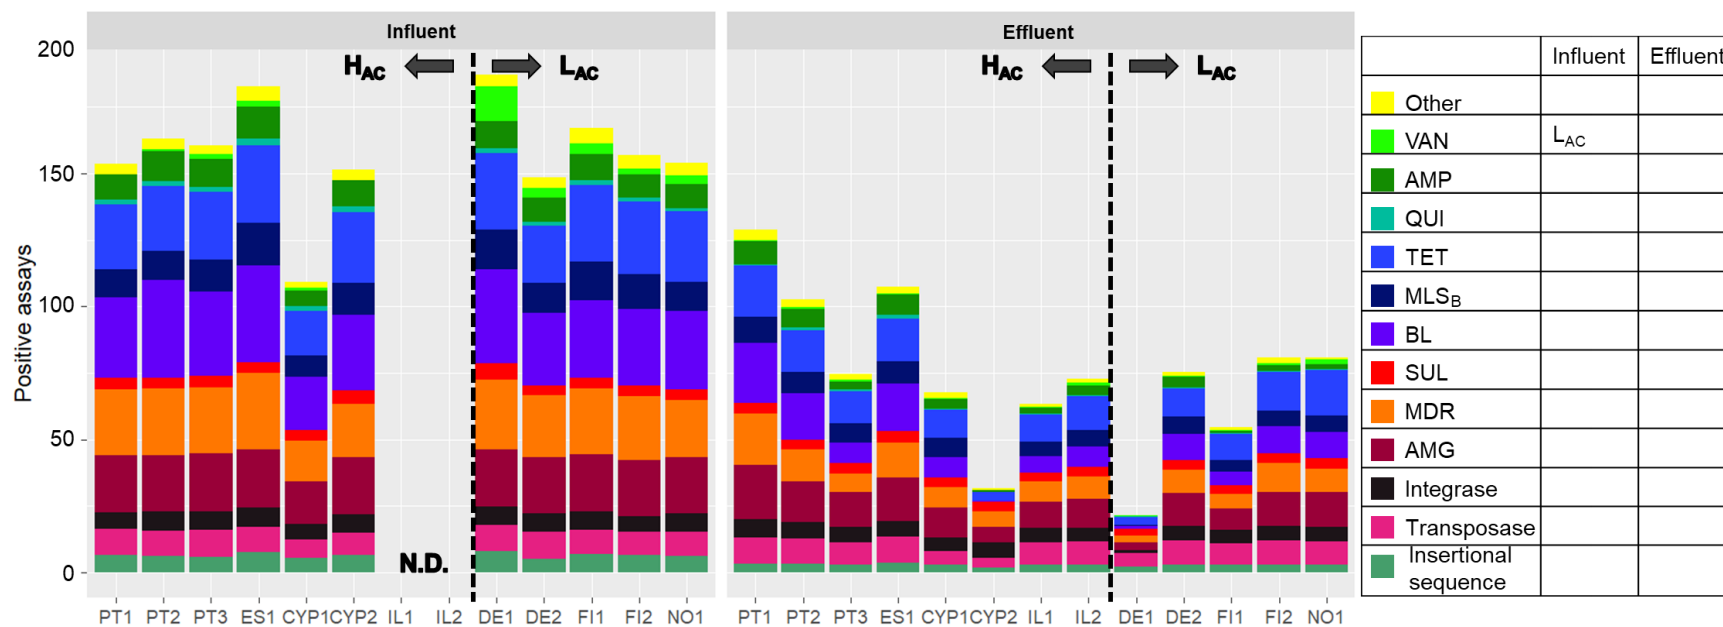

**Fig. S1. Average richness values (number of positive assays) for the different influent and effluent wastewater samples from high ( $H_{AC}$ ) and low ( $L_{AC}$ ) antibiotic consumption countries, for resistance genes and mobile genetic elements.** In the legend, for each gene class are indicated the countries,  $H_{AC}$  or  $L_{AC}$ , with significantly higher richness ( $p < 0.01$ , Mann-Whitney U test). Resistance categories: AMG (aminoglycosides), MDR (multidrug resistance), SUL (sulphonamides), BL (beta-lactams), MLS<sub>B</sub> (macrolide-lincosamide-streptogramin B), TET (tetracyclines), QUI (quinolones), AMP (amphenicols), VAN (vancomycin). N.D. not determined, due to restrictions on influent wastewater sample collection in those UWTPs.

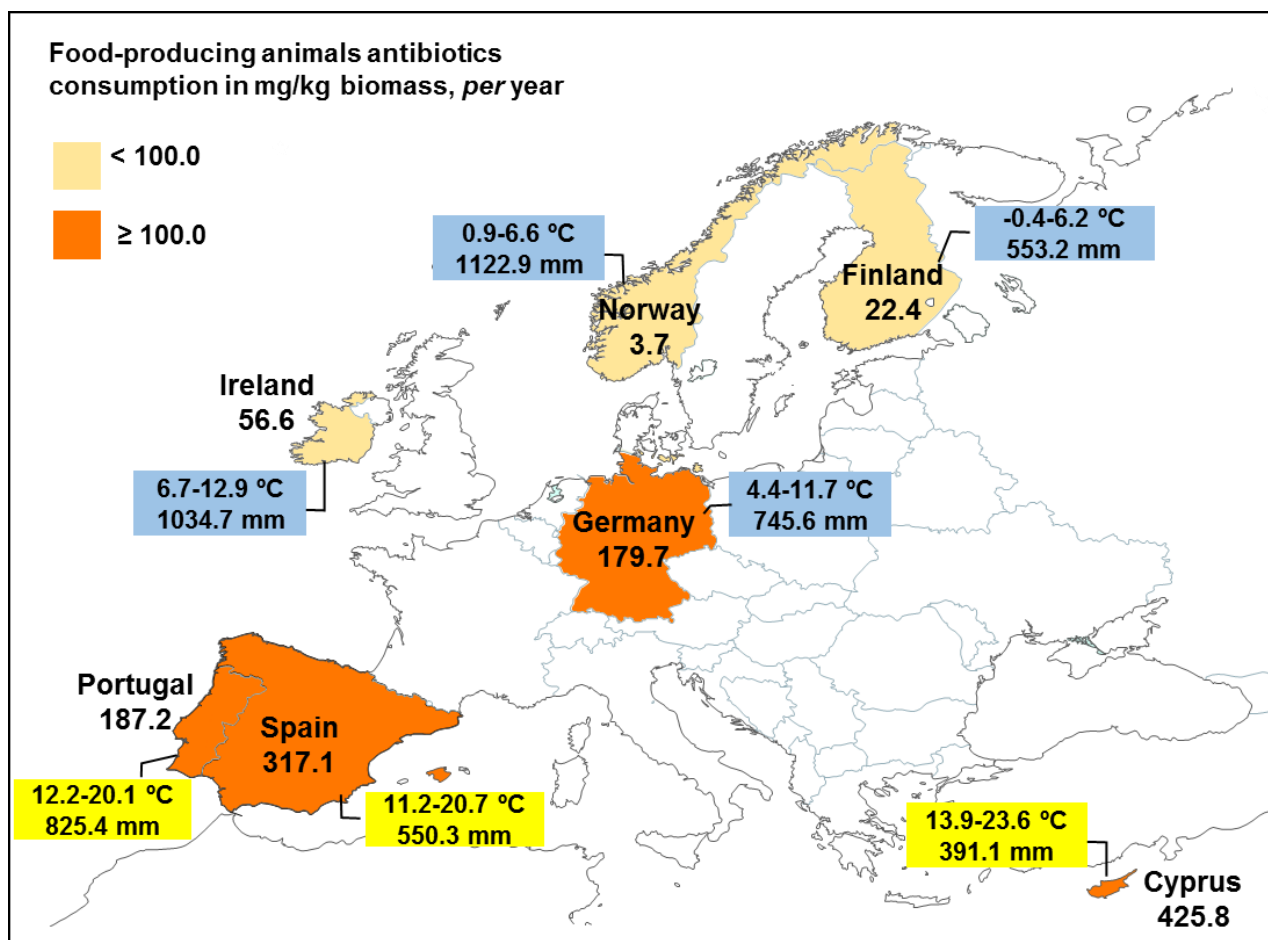

**Fig. S2. Food-producing animals' antibiotics consumption [expressed in biomass (mg/kg), values for 2013] and average maximal and minimal annual temperature and precipitation (yellow, average  $T_{min} > 6^{\circ}\text{C}$ ; blue, average  $T_{max} < 5^{\circ}\text{C}$ ).**

Sources: Scientific report of ECDC, EFSA and EMA, 2017 (32) and weather database (<http://www.weatherbase.com>).

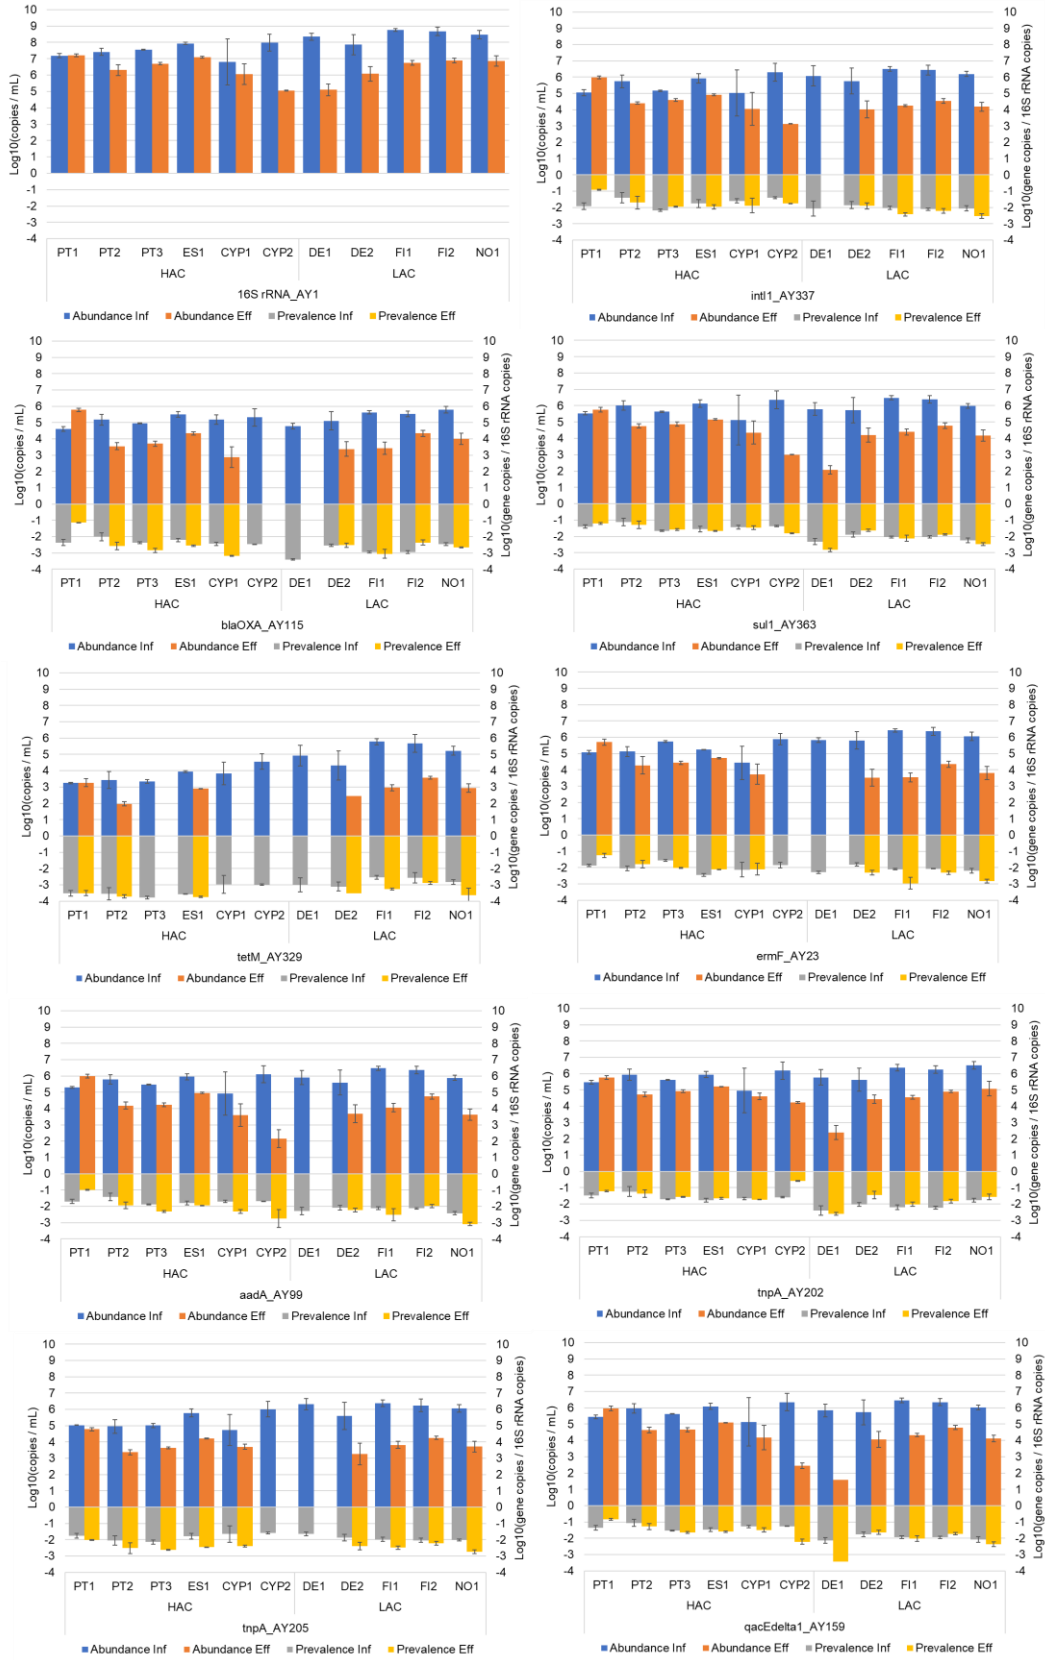

**Fig. S3. Average abundance (copies/ml; upper bars; left-hand legend) and prevalence values (gene copies/16S rRNA gene copies; lower bars; right-hand legend) for the different influent (Inf) and effluent (Eff) wastewater samples from high ( $H_{AC}$ ) and low ( $L_{AC}$ ) antibiotic consumption countries, determined on the basis of qPCR array for the genes: 16S rRNA, *intI1*, *bla<sub>OXA</sub>*, *sul1*, *tetM*, *ermF*, *aadA*, *tnpA*, and *qacEdelta1*. Error bars indicate the standard deviation.**

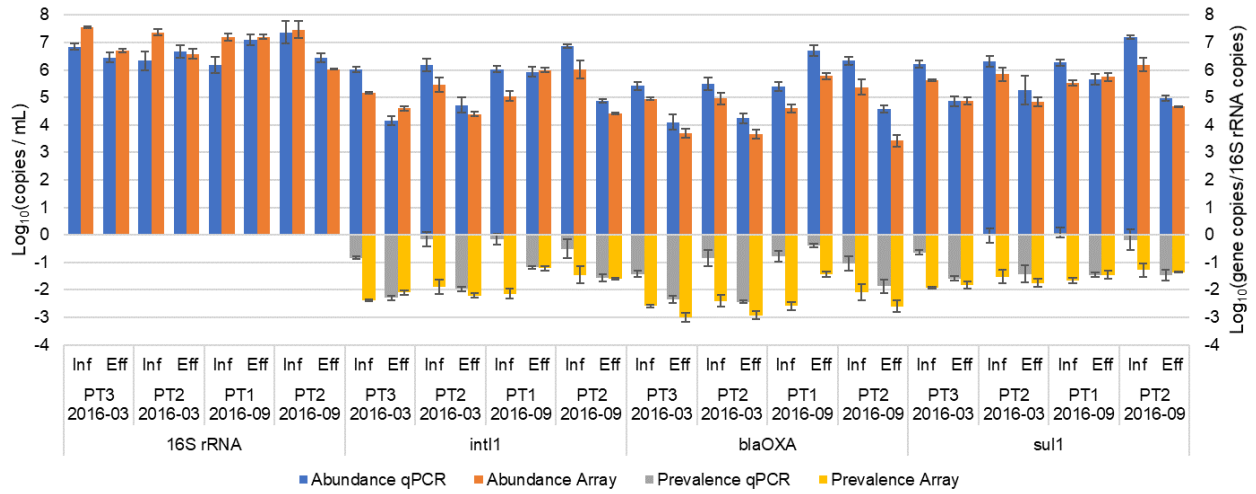

**Fig. S4. Average abundance (copies/ml; upper bars; left-hand legend) and prevalence values (gene copies/16S rRNA copies; lower bars; right-hand legend) calculated by traditional real-time qPCR and qPCR array for Portuguese influent and effluent wastewater samples. Error bars indicate the standard deviation.**

**Table S1. Influent and effluent wastewater samples used in the study.** (Between parentheses the number of days/samples that fulfilled the quality criteria to be analyzed by qPCR array)

| Urban Wastewater Treatment Plant (UWTP) location   |      | October 2015 | March 2016 |          | September 2016 |          |
|----------------------------------------------------|------|--------------|------------|----------|----------------|----------|
|                                                    |      | Effluent     | Influent   | Effluent | Influent       | Effluent |
| Portugal (PT)<br>(North Portugal)                  | PT1  | x (3d)       | n.s.*      | n.s.*    | x (3d)         | x (3d)   |
|                                                    | PT2  | x (3d)       | x (3d)     | x (3d)   | x (3d)         | x (3d)   |
|                                                    | PT3  | n.s.         | x (3d)     | x (3d)   | n.s.           | n.s.     |
| Spain (ES)<br>(Catalonia)                          | ES1  | x (2d)       | x (2d)     | x (2d)   | x (1d)         | x (1d)   |
| Cyprus (CYP)<br>(Limassol and Nicosia)             | CYP1 | x (3d)       | x (2d)     | x (3d)   | x (3d)         | x (3d)   |
|                                                    | CYP2 | x (0d)       | x (0d)     | x (0d)   | x (2d)         | x (3d)   |
| Ireland (IL)<br>(no additional location available) | IL1  | x (3d)       | n.s.**     | x (3d)   | n.s.**         | x (3d)   |
|                                                    | IL2  | x (3d)       | n.s.**     | x (3d)   | n.s.**         | x (3d)   |
| Germany (DE)<br>(Baden-Württemberg and Saxony)     | DE1  | x (1d)       | x (3d)     | x (0d)   | x (3d)         | x (2d)   |
|                                                    | DE2  | x (3d)       | x (1d)     | x (3d)   | x (3d)         | x (3d)   |
| Finland (FI)<br>(Uusimaa)                          | FI1  | x (3d)       | x (3d)     | x (3d)   | x (3d)         | x (3d)   |
|                                                    | FI2  | x (3d)       | x (3d)     | x (3d)   | x (3d)         | x (3d)   |
| Norway (NO)<br>(Eastern Norway)                    | NO1  | x (3d)       | x (3d)     | x (3d)   | x (3d)         | x (3d)   |

n.s. not sampled in these dates

\*Since PT1 suffered an overflow during winter 2016 and was not operating in March 2016, samples were collected in another UWTP in the same region (PT3).

\*\* The analysis of wastewater influent was not possible in Ireland due to restrictions on wastewater sample collection.

**Table S2. qPCR primer sets and the percentage of samples that gave positive results for the influent and effluent wastewater samples. Primers are the same as in the original publication (10) except for those indicated with <sup>a</sup> which were added for this study**

| Functional Classification      | Gene identification       | Forward Primer          | Reverse Primer                | Assay | % Positive Influent | % Positive Effluent |
|--------------------------------|---------------------------|-------------------------|-------------------------------|-------|---------------------|---------------------|
| <b>Housekeeping genes (HK)</b> |                           |                         |                               |       |                     |                     |
|                                | 16S rRNA                  | GGGTTGCGCTCGTTGC        | ATGGYTGTCTGTCAGCTCGTG         | AY1   | 100.0               | 100.0               |
|                                | 16S rRNA (2) <sup>a</sup> | CCTACGGGAGGCAGCAG       | ATTACCGCGGCTGCTGGC            | AY2   | 100.0               | 100.0               |
|                                | gapA                      | CCGTTGAAGTAAAAGACGGTC   | AACCACTTTCTTCGCACCAGC         | AY347 | 96.0                | 31.5                |
|                                | mdh                       | AAGAAACGGGCGTACTGACC    | GTGGCTGATCTGACCAAACG          | AY346 | 94.0                | 34.8                |
|                                | rpoB                      | CGAACATCGGTCTGATCAACTC  | GTTGCATGTTTCGCACCCAT          | AY345 | 44.0                | 18.5                |
|                                | uidA                      | AACCACGCGTCTGTTGACTG    | CCCGGTTGCCAGAGGTG             | AY75  | 78.0                | 19.6                |
| <b>Aminoglycosides (AMG)</b>   |                           |                         |                               |       |                     |                     |
| deactivate                     | aac3-VI                   | CGTCACTTATTCGATGCCCTTAC | GTCGGGCGCGGCATA               | AY93  | 34.0                | 23.9                |
| deactivate                     | aac(6)I1                  | GACCGGATTAAGGCCGATG     | CTTGCCTTGATATTCAGTTTTTATAACCA | AY5   | 0.0                 | 0.0                 |
| deactivate                     | aac(6)-II                 | CGACCCGACTCCGAACAA      | GCACGAATCCTGCCTTCTCA          | AY8   | 84.0                | 20.7                |
| deactivate                     | aac(6)-Ib                 | GTTTGAGAGGCAAGGTACCGTAA | GAATGCCTGGCGTGTTGA            | AY94  | 96.0                | 70.7                |
| deactivate                     | aac(6)-Ib                 | CGTCGCCGAGCAACTTG       | CGGTACCTTGCTCTCAAACC          | AY95  | 96.0                | 64.1                |
| deactivate                     | aac(6)-Ib                 | AGAAGCACGCCCCGACACTT    | GCTCTCCATTGAGCATTGCA          | AY172 | 98.0                | 67.4                |
| deactivate                     | aac(6)-Iy                 | GCTTTGCGGATGCCTCAAT     | GGAGAACAATAACCTTCAAGGAAA      | AY7   | 0.0                 | 0.0                 |
| deactivate                     | aadA                      | AGCTAAGCGCGAACTGCAAT    | TGGCTCGAAGATACCTGCAA          | AY96  | 100.0               | 98.9                |
| deactivate                     | aadA                      | ACGGCTCCGCAGTGGAT       | GGCCACAGTAACCAACAAATCA        | AY97  | 100.0               | 87.0                |
| deactivate                     | aadA                      | GTTGTGCACGACGACATCATT   | GGCTCGAAGATACCTGCAAGAA        | AY99  | 100.0               | 97.8                |
| deactivate                     | aadA                      | CTTGTCGTGCATGACGACATC   | TCGAAGATACCCGCAAGAATG         | AY101 | 98.0                | 88.0                |
| deactivate                     | aadA                      | CAATGACATTCTTGCGGGTATC  | GACCTACCAAGGCAACGCTATG        | AY167 | 100.0               | 98.9                |
| deactivate                     | aadA                      | CGAGATTCTCCGCGCTGTA     | GCTGCCATTCTCAAATTGC           | AY169 | 100.0               | 96.7                |
| deactivate                     | aadA5                     | ATCACGATCTTGCGATTTTGCT  | CTGCGGATGGGCTAGAAG            | AY98  | 96.0                | 67.4                |
| deactivate                     | aadA5                     | GTTCTTGCTCTTGCTCGCATT   | GATGCTCGGCAGGCAAAC            | AY100 | 98.0                | 71.7                |
| deactivate                     | aadA9                     | CGCGGCAAGCCTATCTTG      | CAAATCAGCGACCGCAGACT          | AY168 | 0.0                 | 0.0                 |
| deactivate                     | aadA9                     | GGATGCACGCTTGGATGAA     | CCTCTAGCGGCCGGAGTATT          | AY173 | 0.0                 | 0.0                 |



|                          |           |                              |                                |       |       |      |
|--------------------------|-----------|------------------------------|--------------------------------|-------|-------|------|
| deactivate               | aadD      | CCGACAACATTTCTACCATCCTT      | ACCGAAGCGCTCGTCGTATA           | AY151 | 52.0  | 8.7  |
| deactivate               | aadE      | TACCTTATTGCCCTTGGAAAGAGTTA   | GGAAGTATGTCCCTTTTAATTCTACAATCT | AY174 | 96.0  | 28.3 |
| deactivate               | acc       | CCCTGCGTTGTGGCTATGT          | TTGGCCACGCCAATCC               | AY382 | 0.0   | 0.0  |
| deactivate               | aph       | TTTCAGCAAGTGGATCATGTTAAAAT   | CCAAGCTGTTTCCACTGTTTTTC        | AY166 | 0.0   | 0.0  |
| deactivate               | aphA1/7   | TGAACAAGTCTGGAAAGAAATGCA     | CCTATTAATTTCCCTCGTCAAAAA       | AY170 | 96.0  | 38.0 |
| deactivate               | aphA3     | AAAAGCCCCGAAGAGGAACTTG       | CATCTTTCACAAAGATGTTGCTGTCT     | AY14  | 96.0  | 18.5 |
| deactivate               | aphA3     | CGGAATTGAAAAAACTGATCGAA      | ATACCGGCTGTCCGTCATTT           | AY171 | 96.0  | 35.9 |
| deactivate               | aph(2)-Ib | TGAGCAGTATCATAAGTTGAGTGAAAAG | GACAGAACAATCAATCTCTATGGAATG    | AY104 | 60.0  | 0.0  |
| deactivate               | aph(2)-Id | TAAGGATATACCGACAGTTTTGGAAA   | TTTAATCCCTCTTCATACCAATCCATA    | AY105 | 6.0   | 0.0  |
| deactivate               | aph6      | CCCATCCATGTGTAAGGAAA         | GCCACCGCTTCTGCTGTAC            | AY15  | 0.0   | 0.0  |
| deactivate               | sat4      | GAATGGGCAAAGCATAAAAACTTG     | CCGATTTTGAAACCACAATTATGATA     | AY49  | 96.0  | 16.3 |
| deactivate               | spcN      | AAAAGTTCGATGAAACACGCCTAT     | TCCAGTGGTAGTCCCCGAATC          | AY286 | 0.0   | 0.0  |
| deactivate               | spcN      | CAGAATCTTCCTGAAAAGTTTGATGAA  | CGCAGACACGCCGAATC              | AY287 | 0.0   | 0.0  |
| deactivate               | str       | AATGAGTTTTGGAGTGTCTCAACGTA   | AATCAAAAACCCTATTAAAGCCAAT      | AY175 | 90.0  | 2.2  |
| deactivate               | strA      | CCGGTGGCATTGAGAAAAA          | GTGGCTCAACCTGCGAAAAG           | AY176 | 90.0  | 10.9 |
| deactivate               | strB      | GCTCGGTCTGTGAGAACAATCT       | CAATTTCCGGTCGCCTGGTAGT         | AY177 | 100.0 | 95.7 |
| <b>Amphenicols (AMP)</b> |           |                              |                                |       |       |      |
| deactivate               | catA1     | GGGTGAGTTTCACCAGTTTTGATT     | CACCTTGTCGCCTTGCGTATA          | AY130 | 94.0  | 4.3  |
| deactivate               | catB3     | GCACTCGATGCCTTCCAAAA         | AGAGCCGATCCAAACGTCAT           | AY51  | 96.0  | 41.3 |
| deactivate               | catB8     | CACTCGACGCCTTCCAAAG          | CCGAGCCTATCCAGACATCATT         | AY52  | 86.0  | 17.4 |
| efflux                   | ceoA      | ATCAACACGGACCAGGACAAG        | GGAAAAGTCCGCTCACGATGA          | AY53  | 0.0   | 0.0  |
| efflux                   | cmlA      | AATTTTGCCGATTATTGCTGAAA      | GATTGTCATCATTGTTTATCACCAA      | AY20  | 0.0   | 0.0  |
| efflux                   | cmlA      | TAGGAAGCATCGGAACGTTGAT       | CAGACCGAGCAGACTGTTG            | AY127 | 96.0  | 43.5 |
| efflux                   | cmlA      | AGGAAGCATCGGAACGTTGA         | ACAGACCGAGCAGACTGTTG           | AY128 | 56.0  | 40.2 |
| efflux                   | cmlA      | GCGCTCTTCGAGGATTCG           | CCGCCAAGCAGAAGTAGAC            | AY375 | 96.0  | 43.5 |
| efflux                   | cmxA      | GCGATCGCCATCCTCTGT           | TCGACACGGAGCCTTGGT             | AY129 | 86.0  | 35.9 |
| efflux                   | floR      | ATTGTCTTCACGGTGTCCGTTA       | CCGCGATGTCGTCCGAAT             | AY56  | 92.0  | 44.6 |
| efflux                   | floR      | TCGTATCTACGGCCTTTTC          | CTTGACTTGATCCAGAGGGC           | AY335 | 8.0   | 0.0  |
| efflux                   | mdtL      | TGCTGATCGGGATTCTGATTG        | CAGGCGCGACGAACATAAT            | AY88  | 96.0  | 33.7 |
| efflux                   | rarD      | GCGGGTGTGGTCACTACGAT         | AGCGTTGGGCCGATATACTG           | AY131 | 28.0  | 1.1  |

|                          |                       |                            |                               |       |       |      |
|--------------------------|-----------------------|----------------------------|-------------------------------|-------|-------|------|
| efflux                   | rarD                  | TGACGCATCGCGTGATCT         | AAATTTTCTGTGGCGTCTGAATC       | AY132 | 96.0  | 29.3 |
| efflux                   | yidY/mdtL             | GCAGTTGCATATCGCCTTCTC      | CTTCCCGGCAAACAGCAT            | AY87  | 24.0  | 5.4  |
| <b>Beta-lactams (BL)</b> |                       |                            |                               |       |       |      |
| deactivate               | ampC                  | GCAGCACGCCCGTAA            | TGTACCCATGATGCGCGTACT         | AY30  | 86.0  | 23.9 |
| deactivate               | ampC                  | AACAAAAGATCCCCGGTATGG      | ACGCCCCGTAATGTTTTGCT          | AY31  | 96.0  | 43.5 |
| deactivate               | ampC                  | TCCGGTGACGCGACAGA          | CAGCACGCCGGTGAAAGT            | AY33  | 2.0   | 0.0  |
| deactivate               | ampC                  | CCGCCAGAGCAAGGACTA         | GCTCGACTTCACGCCGTAAG          | AY114 | 0.0   | 0.0  |
| deactivate               | ampC                  | GCAGCGAAGCGTCAGTCA         | AGATCCGTGGCCGCATAA            | AY258 | 4.0   | 0.0  |
| deactivate               | blaI                  | GCAAGTTGAAGCGAAAGAAAAGA    | TACCAGTATCAATCGCATATACACCTAA  | AY39  | 0.0   | 0.0  |
| deactivate               | blaACC                | CACACAGCTGATGGCTTATCTAAAA  | AATAAACCGCATGGGTTCCA          | AY28  | 0.0   | 0.0  |
| deactivate               | blaACT                | TGGCGTATCGGGTCAATGT        | CTCCACGGGCCAGTTGAG            | AY29  | 12.0  | 0.0  |
| deactivate               | blaACT                | CTGTTCGAGCTGGGTCTATAAGTAAA | CAGTATCTGGTCACCGGATCGT        | AY109 | 46.0  | 0.0  |
| deactivate               | blaCMY                | CCGCGGCGAAATTAAGC          | GCCACTGTTTGCCTGTCAGTT         | AY32  | 88.0  | 12.0 |
| deactivate               | blaCMY                | AAAGCCTCATGGGTGCATAAA      | ATAGCTTTTGTTCAGCATCA          | AY108 | 94.0  | 16.3 |
| deactivate               | blaCMY                | GCGAGCAGCCTGAAGCA          | CGGATGGGCTTGTCTCTT            | AY111 | 84.0  | 20.7 |
| deactivate               | blaCTX-M              | GGAGGCGTGACGGCTTTT         | TTCAGTGCATCCAGACGAA           | AY116 | 34.0  | 0.0  |
| deactivate               | blaCTX-M              | GCCGCGGTGCTGAAGA           | ATCGGATTATAGTTAACCAGGTCAGATTT | AY117 | 74.0  | 8.7  |
| deactivate               | blaCTX-M              | CGATACCACACGCCGTTA         | GCATTGCCAACGTCAGATT           | AY118 | 8.0   | 0.0  |
| deactivate               | blaCTX-M              | CTTGGCGTTGCGCTGAT          | CGTTCATCGGCACGGTAGA           | AY119 | 18.0  | 6.5  |
| deactivate               | blaCTX-M              | GCGATAACGTGGCGATGAAT       | GTCGAGACGGAACGTTTCGT          | AY162 | 76.0  | 3.3  |
| deactivate               | blaCTX-M              | CACAGTTGGTGACGTGGCTTAA     | CTCCGCTGCCGGTTTTATC           | AY165 | 38.0  | 3.3  |
| deactivate               | blaCTX-M              | CGTCACGCTGTTGTTAGGAA       | CGCTCATCAGCACGATAAAG          | AY324 | 84.0  | 7.6  |
| deactivate               | blaCTX-M <sup>a</sup> | CGATGTGCAGTACCAGTAA        | GCAATGGGATTGTAGTTAA           | AY326 | 16.0  | 1.1  |
| deactivate               | blaCTX-M <sup>a</sup> | CTATGGCACCACCAACGATA       | ACGGCTTTCTGCCTTAGGTT          | AY360 | 84.0  | 7.6  |
| deactivate               | blaDHA                | TGGCCGAGCAGAAAGA           | CCGTTTTATGCACCCAGGAA          | AY112 | 14.0  | 0.0  |
| deactivate               | blaFOX                | GGTTTGCCGCTGCAGTTC         | GCGGCCAGGTGACCAA              | AY113 | 38.0  | 45.7 |
| deactivate               | blaGES                | GCAATGTGCTCAACGTTCAAG      | GTGCCTGAGTCAATTCTTTCAAAG      | AY120 | 100.0 | 56.5 |
| deactivate               | blaIMP                | AACACGGTTTGGTGGTTCTTGTA    | GCGCTCCACAAACCAATTG           | AY148 | 12.0  | 19.6 |
| deactivate               | blaIMP                | AAGGCAGCATTCTCTCATTTT      | GGATAGATCGAGAATTAAGCCACTCT    | AY242 | 8.0   | 46.7 |
| deactivate               | blaIMP                | GGAATAGAGTGGCTTAATTC       | GGTTTAACAAAACAACCACC          | AY327 | 6.0   | 23.9 |

|            |                      |                                  |                               |       |       |      |
|------------|----------------------|----------------------------------|-------------------------------|-------|-------|------|
| deactivate | blaKPC               | CAGCTCATTCAAGGGCTTTC             | GGCGGCGTTATCACTGTATT          | AY323 | 14.0  | 0.0  |
| deactivate | blaKPC               | GCCGCCGTGCAATACAGT               | GCCGCCAACTCCTTCA              | AY367 | 16.0  | 2.2  |
| deactivate | blaL1                | CACCGGGTTACCAGCTGAAG             | GCGAAGCTGCGCTGTAGTC           | AY48  | 0.0   | 1.1  |
| deactivate | blaMOX/blaCMY        | CTATGTCAATGTGCCGAAGCA            | GGCTTGTCTCTTTTCAATAGC         | AY34  | 94.0  | 21.7 |
| deactivate | blaNDM               | GGCCACACCAGTGACAATATCA           | CAGGCAGCCACCAAAAGC            | AY362 | 0.0   | 0.0  |
| deactivate | blaOCH               | GGCGACTTGCGCCGTAT                | TTTTCTGCTCGGCCATGAG           | AY35  | 2.0   | 0.0  |
| deactivate | blaOKP               | GCCGCCATCACCATGAG                | GGTGACGTTGTCACCGATCTG         | AY40  | 6.0   | 0.0  |
| deactivate | blaOXA               | CGCAATTATCGGCCTAGAACT            | TTGGCTTTCGTCCTTTCATTT         | AY44  | 100.0 | 90.2 |
| deactivate | blaOXA               | CGGATGGTTTGAAGGGTTTATTAT         | TCTTGGCTTTTATGCTTGATGTAA      | AY115 | 96.0  | 83.7 |
| deactivate | blaOXA               | GCAATTGCCTTTTAAACCTGA            | CTGCCTTTTCAACAAAACCC          | AY322 | 96.0  | 35.9 |
| deactivate | blaOXA <sup>a</sup>  | CACTTACAGGAACTTGGGGTCCG          | AGTGTGTTTAGAATGGTGATC         | AY361 | 96.0  | 78.3 |
| deactivate | blaOXY               | CGTTCAGGCCGGCAGGTT               | GCCGCGATATAAGATTTGAGAATT      | AY42  | 18.0  | 0.0  |
| deactivate | blaPDC               | CGCCGTACAACCGGTGAT               | GAAGTAATGCGGTTCTCCTTTC        | AY36  | 2.0   | 0.0  |
| deactivate | blaPER               | TGCTGGTTGCTGTTTTTGTGA            | CCTGCGCAATGATAGCTTCAT         | AY241 | 80.0  | 9.8  |
| deactivate | blaPSE               | TTGTGACCTATCCCCTGTAATAGAA        | TGCGAAGCACGCATCATC            | AY43  | 70.0  | 10.9 |
| deactivate | blaROB               | GCAAAGGCATGACGATTGC              | CGCGCTGTTGTCGCTAAA            | AY41  | 10.0  | 1.1  |
| deactivate | blaSFO               | CCGCCGCCATCCAGTA                 | GGGCCCCAAGATGCT               | AY121 | 64.0  | 6.5  |
| deactivate | blaSHV               | TCCCATGATGAGCACCTTAAA            | TTCGTCACCGGCATCCA             | AY37  | 96.0  | 6.5  |
| deactivate | blaSHV               | CTTTCCCATGATGAGCACCTTT           | TCCTGCTGGCGATAGTGGAT          | AY163 | 90.0  | 4.3  |
| deactivate | blaSHV <sup>a</sup>  | CGCTTTCCCATGATGAGCACCTTT         | TCCTGCTGGCGATAGTGGATCTTT      | AY272 | 58.0  | 3.3  |
| deactivate | blaSHV               | GCGTTATTTTCGCTGTGTA              | AGGTGCTCATCATGGGAAAAG         | AY325 | 76.0  | 0.0  |
| deactivate | blaSRT               | CAGCCGCTGATGAAAAAATATG           | CAGCGAGCCCACTTCGA             | AY259 | 0.0   | 0.0  |
| deactivate | blaTEM <sup>a</sup>  | TTCCTGTTTTTGTACCCAG              | CTCAAGGATCTTACCGCTGTTG        | AY3   | 94.0  | 45.7 |
| deactivate | blaTEM               | AGCATCTTACGGATGGCATGA            | TCCTCCGATCGTTGTCAGAAGT        | AY164 | 96.0  | 53.3 |
| deactivate | blaTLA               | ACACTTTGCCATTGCTGTTTATGT         | TGCAAATTTTCGGCAATAATCTTT      | AY122 | 0.0   | 0.0  |
| deactivate | blaVEB               | CCCGATGCAAAGCGTTATG              | GAAAGATTCCTTTTATCTATCTCAGACAA | AY38  | 100.0 | 45.7 |
| deactivate | blaVIM               | GCACTTCTCGCGGAGATTG              | CGACGGTGATGCGTACGTT           | AY147 | 36.0  | 0.0  |
| deactivate | blaVIM2 <sup>a</sup> | CCTCCATTGAGCGGATTCA              | GCCGTGCCCCGGAA                | AY260 | 10.0  | 0.0  |
| deactivate | blaZ                 | GGAGATAAAGTAACAAATCCAGTTAGATATGA | TGCTTAATTTTCCATTTGCGATAAG     | AY123 | 2.0   | 0.0  |
| deactivate | ccrA                 | GCAGCGTTGCTGGACACA               | GTTCGGGATAAACGTGGTGACT        | AY24  | 22.0  | 0.0  |

|                                   |                        |                              |                              |       |      |      |
|-----------------------------------|------------------------|------------------------------|------------------------------|-------|------|------|
| deactivate                        | cepA                   | AGTTGCGCAGAACAGTCCTCTT       | TCGTATCTTGCCCGTCGATAAT       | AY107 | 82.0 | 18.5 |
| deactivate                        | cfxA                   | TCATTCTCGTTCAAGTTTTTCAGA     | TGCAGCACCAAGAGGAGATGT        | AY106 | 98.0 | 84.8 |
| deactivate                        | cphA                   | GCGAGCTGCACAAGCTGAT          | CGGCCAGTCGCTCTTC             | AY46  | 90.0 | 22.8 |
| deactivate                        | cphA                   | GTGCTGATGGCGAGTTTCTG         | GGTGTGGTAGTTGGTGTGATCAC      | AY47  | 92.0 | 21.7 |
| protection                        | mecA                   | GGTTACGGACAAGGTGAAATACTGAT   | TGTCTTTAATAAGTGAGGTGCGTTAATA | AY155 | 0.0  | 0.0  |
| protection                        | mecA <sup>a</sup>      | GTTGTAGTTGTCGGGTTTGG         | CTCCACATAACCATCTTCTTTAAC     | AY284 | 0.0  | 3.3  |
| protection                        | pbp                    | CCGGTGCCATTGGTTTAGA          | AAAATAGCCGCCCAAGATT          | AY154 | 14.0 | 0.0  |
| protection                        | pbp2x                  | TTTCATAAGTATCTGGACATGGAAGAA  | CCAAAGGAACTTGCTTGAGATTAG     | AY237 | 0.0  | 0.0  |
| protection                        | pbp5                   | GGCGAACTTCTAATTAATCCTATCCA   | CGCCGATGACATTCTTCTTATCTT     | AY153 | 24.0 | 0.0  |
| protection                        | penA                   | AGACGGTAACGTATAACTTTTTGAAAGA | GCGTGTAGCCGGCAATG            | AY236 | 0.0  | 0.0  |
| deactivate                        | sdeB                   | GGCATGCAGAAAGTGTATATGC       | TTAAGTGCGBAAGCGGTAGTG        | AY353 | 0.0  | 0.0  |
| <b>Quinolones (QUI)</b>           |                        |                              |                              |       |      |      |
| efflux                            | pmrA                   | TTTGCAGTTTTGTTCTAATGC        | GCAGAGCCTGATTTCTCCTTGG       | AY239 | 0.0  | 0.0  |
| protection                        | qnrA                   | AGGATTTCTCACGCCAGGATT        | CCGCTTTCAATGAAACTGCAA        | AY248 | 14.0 | 1.1  |
| protection                        | qnrB                   | GCGACGTTCAAGTGGTTCAGA        | GCTGCTCGCCAGTCGAA            | AY328 | 58.0 | 5.4  |
| protection                        | qnrSrtF11 <sup>a</sup> | GACGTGCTAACTTGCGTGAT         | TGGCATTGTTGGAAACTTG          | AY6   | 96.0 | 56.5 |
| <b>Multidrug Resistance (MDR)</b> |                        |                              |                              |       |      |      |
| efflux                            | acrA                   | CAACGATCGGACGGGTTTC          | TGGCGATGCCACCGTACT           | AY61  | 92.0 | 8.7  |
| efflux                            | acrA                   | GGTCTATCACCTACGCGCTATC       | GCGCGCACGAACATACC            | AY62  | 80.0 | 12.0 |
| efflux                            | acrA                   | CAGACCCGCATCGCATATT          | CGACAATTTGCGGCTCATG          | AY249 | 0.0  | 0.0  |
| efflux                            | acrA                   | TACTTTGCGCGCCATCTTC          | CGTGCGGAACGAACAT             | AY256 | 28.0 | 2.2  |
| efflux                            | acrA                   | CGTGCGGAACGAACA              | ACTTTGCGCGCCATCTTC           | AY257 | 50.0 | 13.0 |
| efflux                            | acrB                   | AGTCGGTGTTCGCCGTTAAC         | CAAGGAAACGAACGCAATACC        | AY9   | 96.0 | 23.9 |
| efflux                            | acrB                   | TGGTAGTGGGCGTCATTAACAC       | GGCAACGTAATCCGAAATATCC       | AY10  | 0.0  | 0.0  |
| efflux                            | acrF                   | GCGGCCAGGCACAAAA             | TACGCTCTCCCACGGTTTC          | AY11  | 92.0 | 20.7 |
| regulator                         | acrR                   | GCGCTGGAGACACGACAAC          | GCCTTGCTGCGAGAACAAA          | AY102 | 76.0 | 2.2  |
| regulator                         | acrR                   | GATGATACCCCTGCTGTGAGA        | ACCAAACAAGAAGCGCAAGAA        | AY103 | 96.0 | 34.8 |
| regulator                         | acrR                   | TGCAACACGCGCTTTCTC           | ACGATTGCGGGCAGTTT            | AY350 | 22.0 | 17.4 |
| efflux                            | adeA                   | CAGTTCGAGCGCCTATTTCTG        | CGCCCTGACCGACCAAT            | AY12  | 18.0 | 0.0  |
| efflux                            | bexA                   | GCGGATCTCTGGTCAGCAA          | TGATTGATGGTTCCCCGTACA        | AY27  | 84.0 | 15.2 |

|            |           |                                  |                                 |       |      |      |
|------------|-----------|----------------------------------|---------------------------------|-------|------|------|
| protection | cfr       | GCAAAATTCAGAGCAAGTTACGAA         | AAAATGACTCCCAACCTGCTTTAT        | AY277 | 0.0  | 0.0  |
| efflux     | cmeA      | GCAGCAAAGAAGAAGCACCAA            | AGCAGGGTAAAGTAAAATAAGTGGTAAATCT | AY50  | 0.0  | 0.0  |
| efflux     | cmr       | CGGCATCGTCAGTGGAAATT             | CGGTTCCGAAAAAGATGGAA            | AY57  | 0.0  | 0.0  |
| efflux     | emrB/qacA | CTTTTCTCTAACCGTACATTATCTACGATAAA | AGAACGTAGCGACTGATAAAAATGCT      | AY156 | 0.0  | 0.0  |
| efflux     | emrB/qacA | GCAGTAGAAGGAACGATTGTTAGTACAG     | TGCGTAAACCCAGCTAACAAGTT         | AY352 | 0.0  | 0.0  |
| efflux     | emrD      | CTCAGCAGTATGGTGGTAAGCATT         | ACCAGGCGCCGAAGAAC               | AY64  | 16.0 | 0.0  |
| regulator  | marR      | GCGGCGTACTGGTGAAGCTA             | TGCCCTGGTCGTTGATGA              | AY254 | 0.0  | 0.0  |
| regulator  | marR      | TCTGGCGTTAGCTTACCAGTAC           | GTGCAAAGGCTGGATCGAA             | AY255 | 0.0  | 0.0  |
| regulator  | marR      | GCTGTTGATGACATTGCTCACA           | CGGCGTACTGGTGAAGCTAAC           | AY355 | 12.0 | 0.0  |
| efflux     | mdsA      | CGGAGTCCATCGACCATTTG             | ATCGTCGGCAAGGAGAATCA            | AY253 | 0.0  | 0.0  |
| efflux     | mdtA      | CCTAACGGGCGTGACTTCA              | TTCACCTGTTTCAAGGGTCAAA          | AY78  | 0.0  | 0.0  |
| efflux     | mdtE      | CGTCGGCGCACTCGTT                 | TCCAGACGTTGTACGGTAACCA          | AY81  | 84.0 | 16.3 |
| efflux     | mdtF      | CCACCATCGGGCTTTCC                | CCCTTCTTTCTGCATCATCTCA          | AY373 | 96.0 | 32.6 |
| efflux     | mdtG      | TGGCACAAAATATCTGGCAGTT           | TTGTGTGGCGATAAGAGCATTAG         | AY82  | 96.0 | 31.5 |
| efflux     | mdtG      | TTATCTGTTTTCTGCTCACCTTCTTTT      | GCGTGGTGACAAACAGGCTTA           | AY83  | 0.0  | 0.0  |
| efflux     | mdtH      | CGCGTGAAACCTTAAGTGCTT            | AGACGGCTAAACCCCATATAGCT         | AY85  | 96.0 | 26.1 |
| efflux     | mdtH      | CTGCCGTTAAATGGATGTATGC           | ACTCCAGCGGGCGATAGG              | AY86  | 94.0 | 33.7 |
| efflux     | mepA      | ATCGGTCGCTCTTCGTTAC              | ATAAATAGGATCGAGCTGCTGGAT        | AY245 | 8.0  | 5.4  |
| efflux     | mexA      | AGGACAACGCTATGCAACGAA            | CCGGAAAGGGCCGAAAT               | AY89  | 4.0  | 0.0  |
| efflux     | mexB      | CTGGAGATCGACGACGAGAAG            | GAAATCGTTGACGTAGCTGGAA          | AY374 | 6.0  | 0.0  |
| efflux     | mexD      | TTGCCACTGGCTTTCATGAG             | CACTGCGGAGAACTGTCTGTAGA         | AY90  | 0.0  | 0.0  |
| efflux     | mexE      | GGTCAGCACCGACAAGGTCTAC           | AGCTCGACGTAATTGAGGAACAC         | AY246 | 90.0 | 20.7 |
| efflux     | mexF      | CCGCGAGAAGGCCAAGA                | TTGAGTTCGGCGGTGATGA             | AY247 | 46.0 | 37.0 |
| efflux     | mtrC      | GGACGGGAAGATGGTCCAA              | CGTAGCGTTCGGTTCGAT              | AY250 | 0.0  | 0.0  |
| efflux     | mtrD      | TGCGCGTAGTCGTTTCATCTC            | CGTTCCAATTTCTGATGATTG           | AY230 | 0.0  | 0.0  |
| efflux     | mtrD      | GGTCGGCACGCTCTTGTC               | TGAAGAATTTGCGCACCACTAC          | AY232 | 24.0 | 0.0  |
| efflux     | mtrD      | CCGCCAAGCCGATATAGACA             | GGCCGGGTTGCCAAA                 | AY233 | 0.0  | 2.2  |
| efflux     | mtrE      | CGATGTGTCGTTTTGGAAGGT            | CCTGCACCATGATTCCTCAATA          | AY231 | 0.0  | 0.0  |
| efflux     | oprD      | ATGAAGTGGAGCGCCATTG              | GGCCACGGCGAACTGA                | AY234 | 34.0 | 17.4 |
| efflux     | oprJ      | ACGAGAGTGGCGTCGACAA              | AAGGCGATCTCGTTGAGGAA            | AY235 | 44.0 | 23.9 |

|                                                                |            |                                |                               |       |       |       |
|----------------------------------------------------------------|------------|--------------------------------|-------------------------------|-------|-------|-------|
| efflux                                                         | qac        | GGAGATTTAGCTCATGTAGCTGAAGAA    | AAGCTGTTTTATCCCCGTAGCTTTA     | AY356 | 4.0   | 1.1   |
| efflux                                                         | qacA/qacB  | TGGCAATAGGAGCTATGGTGT          | AAGGTAACACTATTTTCGGTCCAAATC   | AY262 | 2.0   | 0.0   |
| efflux                                                         | qacEdelta1 | TCGCAACATCCGCATTA              | ATGGATTTTCAGAACCAGAGAAAGAAA   | AY126 | 100.0 | 97.8  |
| efflux                                                         | qacEdelta1 | CCCCTTCCGCCGTTGT               | CGACCAGACTGCATAAGCAACA        | AY159 | 100.0 | 98.9  |
| efflux                                                         | qacEdelta1 | GTCGGTGTGCTTATGCAGTCT          | CAACCAGGCAATGGCTGTAA          | AY351 | 100.0 | 100.0 |
| efflux                                                         | qacG       | CAATAATAACCGAAATAATAGGGACAAGTT | AATAAGTGTTTCTAGTGTTGGCCATAG   | AY261 | 0.0   | 0.0   |
| efflux                                                         | qacH       | GTGGCAGCTATCGCTTGGAT           | CCAACGAACGCCACAA              | AY124 | 88.0  | 47.8  |
| efflux                                                         | qacH       | CATCGTGCTTGTGGCAGCTA           | TGAACGCCCAGAAGTCTAGTTTT       | AY125 | 100.0 | 94.6  |
| efflux                                                         | sdeB       | CACTACCGCTCCGCACCTAA           | TGAAAAAACGGGAAAAGTCCAT        | AY160 | 0.0   | 0.0   |
| efflux                                                         | tolC       | GGCCGAGAACCTGATGCA             | AGACTTACGCAATTCCGGGTTA        | AY298 | 96.0  | 32.6  |
| efflux                                                         | tolC       | CAGGCAGAGAACCTGATGCA           | CGCAATTCCGGGTTGCT             | AY299 | 68.0  | 3.3   |
| efflux                                                         | tolC       | GCCAGGCAGAGAACCTGATG           | CGCAATTCCGGGTTGCT             | AY300 | 66.0  | 6.5   |
| efflux                                                         | ttgA       | ACGCCAATGCCAAACGATT            | GTCACGGCGCAGCTTGA             | AY243 | 50.0  | 9.8   |
| efflux                                                         | ttgB       | TCGCCCTGGATGTACACCTT           | ACCATTGCCGACATCAACAAC         | AY244 | 90.0  | 34.8  |
| efflux                                                         | yceL/mdtH  | TCGGGATGGTGGGCAAT              | CGATAACCGAGCCGATGTAGA         | AY84  | 0.0   | 0.0   |
| <b>Macrolide-Lincosamide-Streptogramin B (MLS<sub>B</sub>)</b> |            |                                |                               |       |       |       |
| efflux                                                         | carB       | GGAGTGAGGCTGACCGTAGAAG         | ATCGGCGAAACGCACAAA            | AY288 | 0.0   | 0.0   |
| deactivate                                                     | ereA       | CCTGTGGTACGGAGAATTCATGT        | ACCGCATTGCTTTGCTT             | AY60  | 100.0 | 58.7  |
| deactivate                                                     | ereB       | GCTTTATTTACAGGAGCGGAAT         | TTTTAAATGCCACAGCACAGAATC      | AY63  | 72.0  | 4.3   |
| protection                                                     | erm34      | GCGCGTTGACGACGATTT             | TGGTCATACTCGACGGCTAGAAC       | AY134 | 0.0   | 0.0   |
| protection                                                     | erm(35)    | TTGAAAACGATGTTGCATTAAGTCA      | TCTATAATCACAATAACCACTTGAACGT  | AY21  | 28.0  | 3.3   |
| protection                                                     | erm(36)    | GGCGGACCGACTTGCAT              | TCTGCGTTGACGACGGTTAC          | AY91  | 0.0   | 0.0   |
| protection                                                     | ermA       | TTGAGAAGGGATTTGCGAAAAG         | ATATCCATCTCCACCATTAATAGTAAACC | AY274 | 2.0   | 2.2   |
| protection                                                     | ermA/ermTR | ACATTTTACCAAGGAACCTGTGGAA      | GTGGCATGACATAAACCTTCATCA      | AY283 | 2.0   | 0.0   |
| protection                                                     | ermB       | TAAAGGGCATTTAACGACGAAACT       | TTTATACCTCTGTTTGTAGGGAATTGAA  | AY136 | 96.0  | 82.6  |
| protection                                                     | ermC       | TTTGAAAATCGGCTCAGGAAAA         | ATGGTCTATTTCAATGGCAGTTACG     | AY275 | 2.0   | 4.3   |
| protection                                                     | ermD       | GGACTCGGCAATGGTCAGAA           | CCCCGAAACGCAATATAATGTT        | AY18  | 0.0   | 0.0   |
| protection                                                     | ermF       | CAGCTTTGGTTGAACATTTACGAA       | AAATTCCTAAAATCACAACCGACAA     | AY23  | 100.0 | 94.6  |
| protection                                                     | ermK       | GTTTGATATTGGCATTGTCAGAGAAA     | ACCATTGCCGAGTCCACTTT          | AY17  | 0.0   | 0.0   |
| protection                                                     | ermK       | GAGCCGCAAGCCCC TTT             | GTGTTTCATTTGACGCGGAGTAA       | AY19  | 0.0   | 0.0   |

|            |          |                                 |                               |       |       |      |
|------------|----------|---------------------------------|-------------------------------|-------|-------|------|
| protection | ermT     | GTTCACTAGCACTATTTTAAATGACAGAAGT | GAAGGGTGTCTTTTTAATACAATTAACGA | AY137 | 38.0  | 2.2  |
| protection | ermT     | GTAAAATCCCTAGAGAATACTTTCATCCA   | TGAGTGATATTTTTGAAGGGTGTCTT    | AY238 | 36.0  | 2.2  |
| protection | ermX     | GCTCAGTGGTCCCATGGT              | ATCCCCCGTCAACGTTT             | AY209 | 86.0  | 7.6  |
| protection | ermY     | TTGTCTTTGAAAGTGAAGCAACAGT       | TAACGCTAGAGAACGATTTGTATTGAG   | AY270 | 0.0   | 0.0  |
| efflux     | lmrA     | TTCAGATGCAATGGCGTTTG            | ATAATCGGGAACATAATGAGCATAACTAC | AY77  | 58.0  | 0.0  |
| efflux     | lmrA     | TCGACGTGACCGTAGTGAACA           | CGTGACTACCCAGGTGAGTTGA        | AY252 | 0.0   | 0.0  |
| deactivate | lnuA     | TGACGCTCAACACACTCAAAAA          | TTCATGCTTAAGTTCATACGTGAA      | AY251 | 24.0  | 0.0  |
| deactivate | lnuB     | TGAACATAATCCCCTCGTTTAAAGAT      | TAATTGCCCTGTTTCATCGTAAATAA    | AY67  | 96.0  | 62.0 |
| deactivate | lnuB     | AAAGGAGAAGGTGACCAATACTCTGA      | GGAGCTACGTCAAACAACCAGTT       | AY68  | 96.0  | 67.4 |
| deactivate | lnuC     | TGGTCAATATAACAGATGTAAACCAGATTT  | CACCCAGCCACCATCAA             | AY278 | 0.0   | 3.3  |
| efflux     | matA/mel | TAGTAGGCAAGCTCGGTGTTGA          | CCTGTGCTATTTAAGCCTTGTTTCT     | AY139 | 100.0 | 82.6 |
| efflux     | mefA     | CCGTAGCATTGGAACAGCTTTT          | AAACGGAGTATAAGAGTGCTGCAA      | AY146 | 96.0  | 83.7 |
| deactivate | mphA     | CTGACGCGCTCCGTGTT               | GGTGGTGCATGGCGATCT            | AY140 | 66.0  | 22.8 |
| deactivate | mphA     | TGATGACCCTGCCATCGA              | TTCGCGAGCCCCTCTTC             | AY142 | 70.0  | 28.3 |
| deactivate | mphB     | CGCAGCGCTTGATCTTGTAG            | TTACTGCATCCATACGCTGCTT        | AY141 | 14.0  | 0.0  |
| deactivate | mphC     | CGTTTGAAGTACCGAATTGGAAA         | GCTGCGGGTTTGCCTGTA            | AY273 | 0.0   | 0.0  |
| efflux     | msrA     | CTGCTAACACAAGTACGATTCCAAAT      | TCAAGTAAAGTTGTCTTACCTACACCATT | AY149 | 0.0   | 0.0  |
| efflux     | msrA     | AACGAAATCAAGCGCAACAA            | CAACCGTGCCTTTTTCTTTTG         | AY276 | 0.0   | 3.3  |
| efflux     | msrC     | TCAGACCGGATCGGTTGTC             | CCTATTTTTGGAGTCTTCTCTCTAATGTT | AY138 | 22.0  | 0.0  |
| efflux     | msrC     | GAATCACTTGTCGCGAGTTTGTT         | CGTACACAACGGTTTCGTCAGA        | AY150 | 0.0   | 0.0  |
| efflux     | oleC     | CCCGGAGTCGATGTTCGA              | GCCGAAGACGTACACGAACAG         | AY285 | 0.0   | 3.3  |
| protection | pikR1    | TCGACATGCGTGACGAGATT            | CCGCGAATTAGGCCAGAA            | AY289 | 0.0   | 0.0  |
| protection | pikR2    | TCGTGGGCCAGGTGAAGA              | TTCCCCTTGCCGGTGAA             | AY290 | 0.0   | 0.0  |
| protection | pncA     | GCAATCGAGGCGGTGTTT              | TTGCCGAGCCAATTCA              | AY229 | 2.0   | 5.4  |
| deactivate | vatB     | GGAAAAAGCAACTCCATCTCTTGA        | TCCTGGCATAACAGTAACATTCTGA     | AY224 | 4.0   | 0.0  |
| deactivate | vatB     | TTGGGAAAAAGCAACTCCATCT          | CAATCCACACATCATTTCCAACA       | AY266 | 4.0   | 0.0  |
| deactivate | vatC     | CGATGTTTGGATTGGACGAGAT          | GCTGCAATAATAGCCCCGTTT         | AY267 | 0.0   | 0.0  |
| deactivate | vatC     | CGGAAATTGGGAACGATGTT            | GCAATAATAGCCCCGTTTCTTA        | AY225 | 0.0   | 0.0  |
| deactivate | vatD     | TGCAATAGTAGCTGCTAATTCTGTTGTT    | TGTTTTATTTCGTTAGCAGGATTTCC    | AY73  | 0.0   | 0.0  |
| deactivate | vatE     | GGTGCCATTATCGGAGCAAAT           | TTGGATTGCCACCGACAAT           | AY74  | 0.0   | 0.0  |

|                            |                   |                            |                             |       |       |       |
|----------------------------|-------------------|----------------------------|-----------------------------|-------|-------|-------|
| deactivate                 | vatE              | GACCGTCCTACCAGGCGTAA       | TTGGATTGCCACCGACAATT        | AY263 | 0.0   | 0.0   |
| deactivate                 | vgb               | AGGGAGGGTATCCATGCAGAT      | ACCAAATGCGCCCGTTT           | AY144 | 0.0   | 0.0   |
| deactivate                 | vgb               | CCACGATGGCTGCCTTTG         | GGCCATGCAGGACGGATAT         | AY145 | 0.0   | 0.0   |
| efflux                     | vgaA              | CGAGTATTGTGGAAAGCAGCTAGTT  | CCCGTACCGTTAGAGCCGATA       | AY226 | 0.0   | 0.0   |
| efflux                     | vgaA              | GACGGGTATTGTGGAAAGCAA      | TTTCCTGTACCATTAGATCCGATAATT | AY265 | 0.0   | 0.0   |
| efflux                     | vgaB              | TAAAAGAGAATAAGGCGCAAGGA    | TGTTTAGTAGCATGTTGCATTTTCC   | AY227 | 4.0   | 0.0   |
| efflux                     | vgaB              | GAATGATTAAGCCCCCTTCAAAA    | ATTCGTGTTTCCAACGATTTTCG     | AY264 | 2.0   | 0.0   |
| deactivate                 | vgbA              | ATACGAGCTGCCTAATAAAGGATCTT | TGTGAACCACAGGGCATTATCA      | AY269 | 0.0   | 0.0   |
| deactivate                 | vgbB              | CAGCCGGATTCTGGTCCTT        | TACGATCTCCATTCAATTGGGTAAA   | AY268 | 0.0   | 0.0   |
| <b>Sulphonamides (SUL)</b> |                   |                            |                             |       |       |       |
| protection                 | folA              | CGAGCAGTTCCTGCCAAAG        | CCCAGTCATCCGGTTCATAATC      | AY208 | 4.0   | 0.0   |
| protection                 | folP              | CAGGCTCGTAAATTGATAGCAGAAG  | CTTTCCTTGCGAATCGCTTT        | AY280 | 10.0  | 3.3   |
| protection                 | folP              | GCGATTGCAAGGAAAGTGA        | CACATGGGCCATTTTTTCATC       | AY281 | 10.0  | 0.0   |
| protection                 | folP              | CACGGCTTCGGCTCATGT         | TGCCATCCTGTGACTAGCTACGT     | AY282 | 6.0   | 0.0   |
| protection                 | sul1 <sup>a</sup> | CGCACCGGAAACATCGCTGCAC     | TGAAGTTCGCCGCAAGGCTCG       | AY110 | 90.0  | 70.7  |
| protection                 | sul1              | CAGCGCTATGCGCTCAAG         | ATCCCCGTGCGCTGAGT           | AY178 | 0.0   | 0.0   |
| protection                 | sul1              | GCCGATGAGATCAGACGTATTG     | CGCATAGCGCTGGGTTTC          | AY363 | 100.0 | 100.0 |
| protection                 | sul2              | TCATCTGCCAAACTCGTCGTTA     | GTCAAAGAACGCCGCAATGT        | AY133 | 96.0  | 95.7  |
| protection                 | sul2              | TCCGATGGAGGCCGGTATCTGG     | CGGGAATGCCATCTGCCTTGAG      | AY332 | 94.0  | 89.1  |
| protection                 | sul3              | TCCGTTACGCGAATTGGTGCAG     | TTCGTTACGCCTTACACCAGC       | AY333 | 28.0  | 3.3   |
| <b>Tetracycline (TET)</b>  |                   |                            |                             |       |       |       |
| protection                 | tet(32)           | CCATTACTTCGGACAACGGTAGA    | CAATCTCTGTGAGGGCATTTAACA    | AY54  | 96.0  | 69.6  |
| deactivate                 | tet34             | CTTAGCGCAAACAGCAATCAGT     | CGGTGATACAGCGGTAAACT        | AY321 | 0.0   | 0.0   |
| efflux                     | tet35             | ACCCCATGACGTACCTGTAGAGA    | CAACCCACACTGGCTACCAGTT      | AY320 | 0.0   | 0.0   |
| protection                 | tet(36)           | AGAATACTCAGCAGAGGTCAGTTCCT | TGGTAGGTCGATAACCCGAAAAT     | AY22  | 46.0  | 2.2   |
| protection                 | tet36             | TGCAGGAAAGACCTCCATTACAG    | CTTTGTCCACACTTCCACGTACTATG  | AY301 | 68.0  | 4.3   |
| deactivate                 | tet37             | GAGAACGTTGAAAAGGTGGTGAA    | AACCAAGCCTGGATCAGTCTCA      | AY302 | 0.0   | 0.0   |
| efflux                     | tet38             | TTAATGTGGCGGTATCTGTAGGTATT | TTGCCTGGGAAATTTAATGCTTT     | AY271 | 0.0   | 0.0   |
| efflux                     | tetA              | GCTGTTTGTCTGCCGAAA         | GGTTAAGTTCCTTGAACGCAAACT    | AY13  | 0.0   | 0.0   |
| efflux                     | tetA              | CTCACCAGCCTGACCTCGAT       | CACGTTGTTATAGAAGCCGCATAG    | AY180 | 98.0  | 62.0  |



|            |                   |                                    |                                |       |       |      |
|------------|-------------------|------------------------------------|--------------------------------|-------|-------|------|
| efflux     | tetA/B            | AGTGCGCTTTGGATGCTGTA               | AGCCCCAGTAGCTCCTGTGA           | AY181 | 90.0  | 5.4  |
| efflux     | tetA/B            | GCCCAGTGTCTGTTGTTGTCAT             | TGAAAGCAAACGGCCTAAATACA        | AY190 | 94.0  | 8.7  |
| efflux     | tetA(P)           | AGTTGCAGATGTGTATAGTCGTAACCTATCTATT | TGCTACAAGTACGAAAAACAACTAGAA    | AY55  | 62.0  | 23.9 |
| efflux     | tetC              | CATATCGCAATACATGCGAAAAA            | AAAGCCGCGGTAAATAGCAA           | AY182 | 90.0  | 4.3  |
| efflux     | tetC              | ACTGGTAAGGTAACGCCATTGTC            | ATGCATAAACCCAGCCATTGAGTAAG     | AY199 | 92.0  | 3.3  |
| efflux     | tetC              | TGCGTTGATGCAATTTCTATGC             | GGAATGGTGCATGCAAGGAG           | AY330 | 98.0  | 81.5 |
| efflux     | tetD              | TGCCGCGTTTGATTACACA                | CACCAGTGATCCCGGAGATAA          | AY92  | 20.0  | 0.0  |
| efflux     | tetD              | TGTCATCGCGCTGGTGATT                | CATCCGCTTCCGGGAGAT             | AY188 | 4.0   | 0.0  |
| efflux     | tetD              | CTGGACGCGATGGGAATT                 | TCCGCTTCCGGGAGATATT            | AY349 | 24.0  | 0.0  |
| efflux     | tetE              | TTGGCGCTGTATGCAATGAT               | CGACGACCTATGCGATCTGA           | AY291 | 96.0  | 67.4 |
| efflux     | tetG              | TCAACCATTGCCGATTCGA                | TGGCCCCGCAATCATG               | AY183 | 88.0  | 64.1 |
| efflux     | tetG              | CATCAGCGCCGGTCTTATG                | CCCCATGTAGCCGAACCA             | AY189 | 92.0  | 89.1 |
| efflux     | tetH              | TTTGGGTCATCTTACCAGCATTA            | TTGCGCATTATCATCGACAGA          | AY187 | 64.0  | 2.2  |
| efflux     | tetJ              | GGGTGCCGATTAGATTACCT               | TCGTCCAATGTAGAGCATCCATA        | AY240 | 0.0   | 0.0  |
| efflux     | tetK              | CAGCAGTCATTGAAAATTATCTGATTATA      | CCTTGTAATAACCTACCAAAAATCAAAATA | AY184 | 0.0   | 0.0  |
| efflux     | tetL              | AGCCCGATTATTC AAGGAATTG            | CAAATGCTTTCCCCCTGTTCT          | AY194 | 0.0   | 0.0  |
| efflux     | tetL              | ATGGTTGTAGTTGCGCGCTATAT            | ATCGCTGGACCGACTCCTT            | AY195 | 54.0  | 3.3  |
| protection | tetM              | CATCATAGACACGCCAGGACATAT           | CGCCATCTTTTGCAGAAATCA          | AY186 | 100.0 | 78.3 |
| protection | tetM              | TAATATTGGAGTTTTAGCTCATGTTGATG      | CCTCTCTGACGTTCTAAAAGCGTATTAT   | AY193 | 96.0  | 65.2 |
| protection | tetM              | GCAATTCTACTGATTCTGC                | CTGTTTGATTACAATTTCCGC          | AY329 | 98.0  | 43.5 |
| protection | tetM <sup>a</sup> | GCAATTCTACTGATTCTGC                | CTGTTTGATTACAATTTCCGC          | AY357 | 58.0  | 31.5 |
| protection | tetO              | ATGTGGATACTACAACGCATGAGATT         | TGCCTCCACATGATATTTTTCT         | AY179 | 98.0  | 83.7 |
| protection | tetO              | CAACATTAACGGAAAGTTTATTGTATACCA     | TTGACGCTCCAAATTCATTGTATC       | AY192 | 98.0  | 79.3 |
| protection | tetPB             | ACACCTGGACACGCTGATTTT              | ACCGTCTAGAACGCGGAATG           | AY292 | 0.0   | 1.1  |
| protection | tetPB             | TGATACACCTGGACACGCTGAT             | CGTCCAAAACGCGGAATG             | AY293 | 0.0   | 0.0  |
| protection | tetPB             | TGGGCGACAGTAGGCTTAGAA              | TGACCCTACTGAAACATTAGAAATATACCT | AY294 | 46.0  | 19.6 |
| protection | tetPB             | AGTGGTGCAAATACTGAAAAAGTTGT         | TTTGTTCCTTCGTTTTGGACAGA        | AY295 | 0.0   | 0.0  |
| protection | tetPB             | CTGAAGTGGAGCGATCATTCC              | CCCTCAACGGCAGAAATAACTAA        | AY296 | 0.0   | 0.0  |
| protection | tetQ              | CGCCTCAGAAGTAAGTTCATACACTAAG       | TCGTTTCATGCGGATATTATCAGAAT     | AY185 | 100.0 | 89.1 |
| regulator  | tetR              | ATGAGTTCGGCCAGAATTTCC              | GGTTGTGCGCGAAATGATT            | AY135 | 0.0   | 0.0  |

|                         |                      |                                |                             |       |      |      |
|-------------------------|----------------------|--------------------------------|-----------------------------|-------|------|------|
| regulator               | tetR                 | CGCGATAGACGCCTTCGA             | TCCTGACAACGAGCCTCCTT        | AY197 | 98.0 | 50.0 |
| regulator               | tetR                 | CGCGATGGAGCAAAAGTACAT          | AGTGAAAAACCTTGTTGGCATAAAA   | AY198 | 94.0 | 5.4  |
| regulator               | tetR                 | CAATCCATCGACAATCAC             | GACAATCAGCTACTTCAC          | AY381 | 90.0 | 37.0 |
| protection              | tetS                 | TTAAGGACAAACTTTCTGACGACATC     | TGTCTCCATTGTTCTGGTTCA       | AY200 | 58.0 | 0.0  |
| protection              | tetT                 | CCATATAGAGGTTCCACCAAATCC       | TGACCCTATTGGTAGTGGTTCTATTG  | AY297 | 42.0 | 3.3  |
| unknown                 | tetU                 | GTGGCAAAGCAACGGATTG            | TGCGGGCTTGCAAAACTATC        | AY69  | 6.0  | 0.0  |
| unknown                 | tetU                 | AACAGCGGGTTAAGTGTGCAA          | ATGGTATCATTGAGTTTTCCGACAAT  | AY70  | 0.0  | 0.0  |
| efflux                  | tetV                 | GCGGGAACGACGATGTATATC          | CCGCTATCTCACGACCATGAT       | AY228 | 0.0  | 0.0  |
| protection              | tetW                 | ATGAACATTCCCACCGTTATCTTT       | ATATCGGCGGAGAGCTTATCC       | AY191 | 98.0 | 91.3 |
| deactivate              | tetX                 | AAATTTGTTACCGACACGGAAGTT       | CATAGCTGAAAAAATCCAGGACAGTT  | AY196 | 98.0 | 88.0 |
| <b>Vancomycin (VAN)</b> |                      |                                |                             |       |      |      |
| protection              | vanA                 | AAAAGGCTCTGAAAACGCAGTTAT       | CGGCCGTTATCTTGTA AAAACAT    | AY210 | 2.0  | 0.0  |
| protection              | vanA <sup>a</sup>    | TCTGCAATAGAGATAGCCGC           | GGAGTAGCTATCCCAGCATT        | AY368 | 2.0  | 0.0  |
| protection              | vanA3FP <sup>a</sup> | CTGTGAGGTCGGTTGTGCG            | TTTGGTCCACCTCGCCA           | AY4   | 12.0 | 27.2 |
| protection              | vanB                 | TTGTGCGCGAAGTGGATCA            | AGCCTTTTTCCGGCTCGTT         | AY211 | 0.0  | 0.0  |
| protection              | vanB                 | CCGGTCGAGGAACGAAATC            | TCCTCCTGCAAAAAAAGATCAAC     | AY212 | 8.0  | 0.0  |
| protection              | vanB                 | GGCTGTTTCGGGCTGTGA             | AACAATAACGCGGCACTGTT        | AY354 | 2.0  | 0.0  |
| protection              | vanC                 | ACAGGGATTGGCTATGAACCAT         | TGACTGGCGATGATTTGACTATG     | AY66  | 10.0 | 0.0  |
| protection              | vanC                 | CCTGCCACAATCGATCGTT            | CGGCTTCATTCCGGCTTGATA       | AY71  | 0.0  | 0.0  |
| protection              | vanC                 | AAATCAATACTATGCCGGGCTTT        | CCGACCGCTGCCATCA            | AY72  | 48.0 | 34.8 |
| protection              | vanC                 | AGGCATAGCGGGTATTGAA            | CAATCGTCAATTGCTCATTTCC      | AY303 | 0.0  | 0.0  |
| protection              | vanC2/vanC3          | TTGACTGTGCGGTGCTTGTA           | TCAATCGTTTCAGGCAATGG        | AY304 | 28.0 | 0.0  |
| protection              | vanD                 | CAGAGGAACATAATGTTTCGATAAAAATCT | GCCGGATTTTGTGATTCCAA        | AY213 | 10.0 | 0.0  |
| protection              | vanG                 | ATTTGAATTGGCAGGTATACAGGTTA     | TGATTTGTCTTTGTCCATACATAATGC | AY305 | 0.0  | 0.0  |
| protection              | vanHB                | GAGGTTTCCGAGGCGACAA            | CTCTCGGCGGCAGTCGTAT         | AY215 | 4.0  | 3.3  |
| protection              | vanHD                | GTGGCCGATTATACCGTCATG          | CGCAGGTCATTCAGGCAAT         | AY214 | 6.0  | 0.0  |
| protection              | vanRA                | CCCTTACTCCCACCGAGTTTT          | TTCGTGCCCCATATCTCAT         | AY216 | 2.0  | 0.0  |
| protection              | vanRA                | CCACTCCGGCCTTGTCATT            | GCTAACACATTCCCCTTGTTTT      | AY217 | 2.0  | 0.0  |
| protection              | vanRB                | GCCCTGTGCGATGACGAA             | TTACATAGTCGTCTGCCTCTGCAT    | AY306 | 0.0  | 0.0  |
| protection              | vanRC                | TGCGGAAAAAAGTGAACGA            | CCCCCATACGGTTTTGATTA        | AY307 | 0.0  | 0.0  |

|              |                    |                                |                              |       |      |      |
|--------------|--------------------|--------------------------------|------------------------------|-------|------|------|
| protection   | vanRC4             | AGTGCTTTGGCTTATCTCGAAAA        | TCCGGCAGCATCACATCTAA         | AY308 | 20.0 | 0.0  |
| protection   | vanRD              | TTATAATGGCAAGGATGCACTAAAGT     | CGTCTACATCCGGAAGCATGA        | AY309 | 4.0  | 0.0  |
| protection   | vanSA              | CGCGTCATGCTTTCAAAATTC          | TCCGCAGAAAGCTCAATTTGTT       | AY218 | 2.0  | 0.0  |
| protection   | vanSB              | GCGCGGCAAATGACAAC              | TTTGCCATTTTATTCGCACTGT       | AY310 | 8.0  | 3.3  |
| protection   | vanSC              | ATCAACTGCGGGAGAAAAGTCT         | TCCGCTGTTCCGCTTCTT           | AY311 | 0.0  | 0.0  |
| protection   | vanSC              | GCCATCAGCGAGTCTGATGA           | CAGCTGGGATCGTTTTTCCTT        | AY312 | 2.0  | 0.0  |
| protection   | vanSE              | TGGCCGAAGAAGCAGGAA             | CAATAATACTCGTCAAAGGAGTTCTCA  | AY313 | 0.0  | 0.0  |
| protection   | vanTC              | CACACGCATTTTTTCCCATCTAG        | CAGCCAACAGATCATCAAAACAA      | AY161 | 18.0 | 0.0  |
| protection   | vanTC              | GTGGTGCCAAGGAAGTTGCT           | CGTAGCCACCGCAAAAAAAT         | AY314 | 0.0  | 0.0  |
| protection   | vanTC              | ACAGTTGCCGCTGGTGAAG            | CGTGGCTGGTTCGATCAAAA         | AY315 | 4.0  | 0.0  |
| protection   | vanTG              | CGTG TAGCCGTTCCGTTCTT          | CGGCATTACAGGTATATCTGGAAA     | AY316 | 40.0 | 0.0  |
| protection   | vanWB              | CGGACAAAGATACCCCTATAAAG        | AAATAGTAAATTGCTCATCTGGCACAT  | AY220 | 8.0  | 0.0  |
| protection   | vanWG              | ACATTTTCATTTTGGCAGCTTGTAC      | CCGCATAAGAGCCTACAATCT        | AY219 | 54.0 | 0.0  |
| protection   | vanXA              | CGCTAAATATGCCACTTGGGATA        | TCAAAGCGATTACAGCCAACT        | AY221 | 2.0  | 0.0  |
| protection   | vanXB              | AGGCACAAAATCGAAGATGCTT         | GGGTATGGCTCATCAATCAACTT      | AY223 | 16.0 | 0.0  |
| protection   | vanXD              | TAAACCGTGTTATGGGAACGAA         | GCGATAGCCGTTCCATAAGA         | AY222 | 4.0  | 0.0  |
| protection   | vanYB              | GGCTAAAGCGGAAGCAGAAA           | GATATCCACAGCAAGACCAAGCT      | AY317 | 4.0  | 0.0  |
| protection   | vanYD              | AAGGCGATACCCTGACTGTCA          | ATTGCCGGACGGAAGCA            | AY318 | 10.0 | 0.0  |
| protection   | vanYD              | CAAACGGAAGAGAGGTCACCTTACA      | CGGACGGTAATAGGGACTGTTC       | AY319 | 8.0  | 0.0  |
| <b>Other</b> |                    |                                |                              |       |      |      |
| protection   | mcr-1 <sup>a</sup> | ACACTTATGGCACGGTCTATG          | GCACACCCAAACCAATGATAC        | AY80  | 0.0  | 0.0  |
| deactivate   | dfrA1              | GGAATGGCCCTGATATTCCA           | AGTCTTGGCTCCAACCAACAG        | AY58  | 96.0 | 48.9 |
| deactivate   | dfrA1              | TTCAGGTGGTGGGAGATATAC          | TTAGAGGGCGAAGTCTTGGGTAA      | AY334 | 0.0  | 0.0  |
| deactivate   | dfrA12             | CCTCTACCGAACCGTCACACA          | GCGACAGCGTTGAAACAACACTAC     | AY59  | 86.0 | 12.0 |
| deactivate   | merA               | GTGCCGTCCAAGATCATG             | GGTGAAGTCCAGTAGGGTGA         | AY331 | 82.0 | 82.6 |
| deactivate   | bacA               | CGGCTTCGTGACCTCGTT             | ACAATGCGATACCAGGCAAAT        | AY157 | 10.0 | 1.1  |
| deactivate   | bacA               | TTCCACGACACGATTAAGTCATTG       | CGGCTCTTTCGGCTTCAG           | AY158 | 96.0 | 34.8 |
| protection   | fabK               | TTTCAGCTCAGCACTTTGGTCAT        | AAGGCATCTTTTTTCAGCCAGTTC     | AY279 | 0.0  | 3.3  |
| deactivate   | fosB               | TCACTGTAACATAATGAAGCATTAGACCAT | CCATCTGGATCTGTAAAGTAAAGAGATC | AY143 | 0.0  | 0.0  |
| deactivate   | fosX               | GATTAAGCCATATCACTTTAATTGTGAAAG | TCTCCTCCATAATGCAAATCCA       | AY76  | 0.0  | 0.0  |

|                             |                   |                            |                               |       |       |      |
|-----------------------------|-------------------|----------------------------|-------------------------------|-------|-------|------|
| regulator                   | imiR              | CCGACTAGAGCTTCATGTAAGC     | CCCACGCGGTACTCTTGTAAG         | AY65  | 0.0   | 0.0  |
| deactivate                  | nimE              | TGCGCCAAGATAGGGCATA        | GTCGTGAATTCGGCAGGTTTA         | AY152 | 50.0  | 0.0  |
| deactivate                  | nisB              | GGGAGAGTTGCCGATGTTGTA      | AGCCACTCGTTAAAGGGCAAT         | AY79  | 6.0   | 0.0  |
| deactivate                  | nisB              | CGGTTGAACGGCGTGAA          | TTCCACCCAGGTTTGCTACTATT       | AY348 | 14.0  | 0.0  |
| deactivate                  | yyaR              | CCGTTGCAAGAAGATTATAGAAAAA  | CAAGCATAAGACCGCATAAATGAT      | AY16  | 0.0   | 0.0  |
| <b>Integrase</b>            |                   |                            |                               |       |       |      |
| MGE                         | intI <sup>a</sup> | GATCGGTCTGAATGCGTGT        | GCCTTGATGTTACCCGAGAG          | AY45  | 100.0 | 97.8 |
| MGE                         | intI              | CGAAGTCGAGGCATTTCTGTC      | GCCTTCCAGAAAACCGAGGA          | AY336 | 100.0 | 97.8 |
| MGE                         | intI              | GCCTTGATGTTACCCGAGAG       | GATCGGTCTGAATGCGTGT           | AY337 | 96.0  | 95.7 |
| MGE                         | intI              | CGAACGAGTGGCGGAGGGTG       | TACCCGAGAGCTTGGCACCCA         | AY359 | 96.0  | 94.6 |
| MGE                         | intI              | CTGGATTTCGATCACGGCACG      | ACATGCGTGTAATCATCGTCTG        | AY364 | 86.0  | 84.8 |
| MGE                         | int2              | TGCTTTTCCCACCCTTACC        | GACGGCTACCCTCTGTTATCTC        | AY338 | 96.0  | 15.2 |
| MGE                         | int3              | GCCACCACTTGTGAGGA          | GGATGTCTGTGCCTGCTTG           | AY339 | 94.0  | 66.3 |
| <b>Transposase</b>          |                   |                            |                               |       |       |      |
| MGE                         | IS613             | AGGTTCTGGACTCAATGCAACA     | TTCAGCACATAACCGCCTTGAT        | AY26  | 68.0  | 75.0 |
| MGE                         | tnpA              | GCCGCACTGTCGATTTTATC       | GCGGGATCTGCCACTTCTT           | AY201 | 100.0 | 92.4 |
| MGE                         | tnpA              | CCGATCACGGAAAGCTCAAG       | GGCTCGCATGACTTCGAATC          | AY202 | 98.0  | 95.7 |
| MGE                         | tnpA              | GGGCGGGTCGATTGAAA          | GTGGGCGGGATCTGCTT             | AY203 | 92.0  | 90.2 |
| MGE                         | tnpA              | CATCATCGGACGGACAGAATT      | GTCGGAGATGTGGGTGTAGAAAGT      | AY204 | 90.0  | 78.3 |
| MGE                         | tnpA              | GAAACCGATGCTACAATATCCAATTT | CAGCACCGTTTGCAGTGTAAG         | AY205 | 100.0 | 91.3 |
| MGE                         | tnpA              | TGCAGATGGTTTAACTTGGATATTT  | TCGGTTCATCAAAGTCTTAC          | AY206 | 96.0  | 66.3 |
| MGE                         | tnpA              | AATTGATGCGGACGGCTTAA       | TCACCAAAGTGTATGGAGTCGTT       | AY207 | 96.0  | 81.5 |
| MGE                         | TP614             | GGAAATCAACGGCATCCAGTT      | CATCCATGCGCTTTTGTCTCT         | AY25  | 100.0 | 80.4 |
| MGE                         | trfA              | ACGAAGAAATGGTTGTCCTGTTC    | CGTCAGCTTGGCGTACTTCTC         | AY358 | 78.0  | 66.3 |
| <b>Insertional sequence</b> |                   |                            |                               |       |       |      |
| MGE                         | IS1111            | GTCTTAAGGTGGGCTGCGTG       | CCCCGAATCTCATTGATCAGC         | AY376 | 0.0   | 1.1  |
| MGE                         | IS1133            | GCAGCGTCGGGTTGGA           | ACGCGTTCGAACAAGTGAATG         | AY383 | 82.0  | 2.2  |
| MGE                         | ISAb3             | TCAGAGGCAGCGGTATACGA       | GGTTGATTCAGTTAAAGTACGTAAAATTT | AY371 | 100.0 | 91.3 |
| MGE                         | ISEfm1            | AGGTGTCCATGACGTGAAAGTG     | TCCTTTGTCCCCTAGGATATTGG       | AY372 | 92.0  | 5.4  |
| MGE                         | ISPps             | CACACTGCAAAAACGCATCCT      | TGTCTTTGGCGTCACAGTTCTC        | AY369 | 100.0 | 95.7 |

|                                |                            |                         |                               |              |                            |                            |
|--------------------------------|----------------------------|-------------------------|-------------------------------|--------------|----------------------------|----------------------------|
| MGE                            | ISSm2                      | TGGATCGACCGGTTCCAT      | GCTGACCGAGCTGTCCATGT          | AY370        | 100.0                      | 100.0                      |
| MGE                            | orf37-IS26                 | GCCGGGTTGTGCAAATAGAC    | TGGCAATCTGTGCTGCTGTG          | AY365        | 50.0                       | 0.0                        |
| MGE                            | orf39-IS26                 | GCGCGTCGAGCATCAATAG     | CAGTTGTGCTGCTGGTGGTC          | AY366        | 82.0                       | 5.4                        |
| MGE                            | Tn5                        | CAGCATAAAAAATCCCCACAACA | CCCCGCAACAGACATACGT           | AY384        | 48.0                       | 0.0                        |
| <b>Plasmid-associated</b>      |                            |                         |                               |              |                            |                            |
| MGE                            | IncN_rep                   | AGTTCACCACCTACTCGCTCCG  | CAAGTTCTTCTGTTGGGATTCCG       | AY340        | n.a.                       | n.a.                       |
| MGE                            | IncN_oriT                  | TTGGGCTTCATAGTACCC      | GTGTGATAGCGTGATTTATGC         | AY341        | n.a.                       | n.a.                       |
| MGE                            | IncP_oriT                  | CAGCCTCGCAGAGCAGGAT     | CAGCCGGGCAGGATAGGTGAAGT       | AY342        | n.a.                       | n.a.                       |
| MGE                            | IncQ_oriT                  | TTCGCGCTCGTTGTTCTTCGAGC | GCCGTTAGGCCAGTTTCTCG          | AY343        | n.a.                       | n.a.                       |
| MGE                            | IncW_trwAB                 | AGCGTATGAAGCCCGTGAAGGG  | AAAGATAAGCGGCAGGACAATAACG     | AY344        | n.a.                       | n.a.                       |
| MGE                            | PAMBL                      | CAGGCTCTAATGTGATA       | TTATGCTCAATACTCGTG            | AY377        | n.a.                       | n.a.                       |
| MGE                            | pAKD1                      | GGTAAGATTACCGATAAACT    | GTTCGTGAAGAAGATGTA            | AY380        | n.a.                       | n.a.                       |
| MGE                            | pNI105                     | CGTAAGGATGTTTACAC       | CTCAACCGTTCTAGGATT            | AY379        | n.a.                       | n.a.                       |
| MGE                            | repA                       | CCCCAGGACTTGCGAGCG      | GAGGCATGCACGCCGACCA           | AY378        | n.a.                       | n.a.                       |
|                                | <b>Gene identification</b> | <b>Forward Primer</b>   | <b>Reverse Primer</b>         | <b>Assay</b> | <b>% Positive Influent</b> | <b>% Positive Effluent</b> |
| <b>Housekeeping genes (HK)</b> |                            |                         |                               |              |                            |                            |
|                                | 16S rRNA                   | GGGTTGCGCTCGTTGC        | ATGGYTGTCGTCAGCTCGTG          | AY1          | 100.0                      | 100.0                      |
|                                | 16S rRNA (2) <sup>a</sup>  | CCTACGGGAGGCAGCAG       | ATTACCGCGGCTGCTGGC            | AY2          | 100.0                      | 100.0                      |
|                                | gapA                       | CCGTTGAAGTGAAAGACGGTC   | AACCACTTCTTCGCACCAGC          | AY347        | 96.0                       | 31.5                       |
|                                | mdh                        | AAGAAACGGGCGTACTGACC    | GTGGCTGATCTGACCAAACG          | AY346        | 94.0                       | 34.8                       |
|                                | rpoB                       | CGAACATCGGTCTGATCAACTC  | GTTGCATGTTTCGCACCCAT          | AY345        | 44.0                       | 18.5                       |
|                                | uidA                       | AACCACGCGTCTGTTGACTG    | CCCGGTTGCCAGAGGTG             | AY75         | 78.0                       | 19.6                       |
| <b>Aminoglycosides (AMG)</b>   |                            |                         |                               |              |                            |                            |
| deactivate                     | aac3-VI                    | CGTCACTTATTCGATGCCCTTAC | GTCGGGCGCGGCATA               | AY93         | 34.0                       | 23.9                       |
| deactivate                     | aac(6)II                   | GACCGGATTAAGGCCGATG     | CTTGCCTTGATATTCAGTTTTTATAACCA | AY5          | 0.0                        | 0.0                        |
| deactivate                     | aac(6)-II                  | CGACCCGACTCCGAACAA      | GCACGAATCCTGCCTTCTCA          | AY8          | 84.0                       | 20.7                       |
| deactivate                     | aac(6)-Ib                  | GTTTGAGAGGCAAGGTACCGTAA | GAATGCCTGGCGTGTGTTGA          | AY94         | 96.0                       | 70.7                       |
| deactivate                     | aac(6)-Ib                  | CGTCGCCGAGCAACTTG       | CGGTACCTTGCCCTCTCAAACC        | AY95         | 96.0                       | 64.1                       |
| deactivate                     | aac(6)-Ib                  | AGAAGCACGCCGACACTT      | GCTCTCCATTCAGCATTGCA          | AY172        | 98.0                       | 67.4                       |

|                          |           |                              |                               |       |       |      |
|--------------------------|-----------|------------------------------|-------------------------------|-------|-------|------|
| deactivate               | aac(6)-Iy | GCTTTGCGGATGCCTCAAT          | GGAGAACAAAAATACCTTCAAGGAAA    | AY7   | 0.0   | 0.0  |
| deactivate               | aadA      | AGCTAAGCGCGAACTGCAAT         | TGGCTCGAAGATACCTGCAA          | AY96  | 100.0 | 98.9 |
| deactivate               | aadA      | ACGGCTCCGCAGTGGAT            | GGCCACAGTAACCAACAAATCA        | AY97  | 100.0 | 87.0 |
| deactivate               | aadA      | GTTGTGCACGACGACATCATT        | GGCTCGAAGATACCTGCAAGAA        | AY99  | 100.0 | 97.8 |
| deactivate               | aadA      | CTTGTCTGTCATGACGACATC        | TCGAAGATACCCGCAAGAATG         | AY101 | 98.0  | 88.0 |
| deactivate               | aadA      | CAATGACATTCTTGCGGGTATC       | GACCTACCAAGGCAACGCTATG        | AY167 | 100.0 | 98.9 |
| deactivate               | aadA      | CGAGATTCTCCGCGCTGTA          | GCTGCCATTCTCCAAATTGC          | AY169 | 100.0 | 96.7 |
| deactivate               | aadA5     | ATCACGATCTTGCGATTTTGCT       | CTGCGGATGGGCTAGAAAG           | AY98  | 96.0  | 67.4 |
| deactivate               | aadA5     | GTTCTTGCTCTTGCTCGCATT        | GATGCTCGGCAGGCAAAC            | AY100 | 98.0  | 71.7 |
| deactivate               | aadA9     | CGCGGCAAGCCTATCTTG           | CAAATCAGCGACCGCAGACT          | AY168 | 0.0   | 0.0  |
| deactivate               | aadA9     | GGATGCACGCTTGGATGAA          | CCTCTAGCGGCCGGAGTATT          | AY173 | 0.0   | 0.0  |
| deactivate               | aadD      | CCGACAACATTTCTACCATCCTT      | ACCGAAGCGCTCGTCGTATA          | AY151 | 52.0  | 8.7  |
| deactivate               | aadE      | TACCTTATTGCCCTTGAAGAGTTA     | GGAACATGTCCCTTTTAATTCTACAATCT | AY174 | 96.0  | 28.3 |
| deactivate               | acc       | CCCTGCGTTGTGGCTATGT          | TTGGCCACGCCAATCC              | AY382 | 0.0   | 0.0  |
| deactivate               | aph       | TTTCAGCAAGTGGATCATGTTAAAAT   | CCAAGCTGTTTCCACTGTTTTTC       | AY166 | 0.0   | 0.0  |
| deactivate               | aphA1/7   | TGAACAAGTCTGGAAAGAAAATGCA    | CCTATTAATTTCCCTCGTCAAAAA      | AY170 | 96.0  | 38.0 |
| deactivate               | aphA3     | AAAAGCCCCGAAGAGGAACTTG       | CATCTTTCACAAAGATGTTGCTGTCT    | AY14  | 96.0  | 18.5 |
| deactivate               | aphA3     | CGGAATTGAAAAAACTGATCGAA      | ATACCGGCTGTCCGTCATTT          | AY171 | 96.0  | 35.9 |
| deactivate               | aph(2)-Ib | TGAGCAGTATCATAAGTTGAGTGAAAAG | GACAGAACAATCAATCTCTATGGAATG   | AY104 | 60.0  | 0.0  |
| deactivate               | aph(2)-Id | TAAGGATATACCGACAGTTTTGGAAA   | TTTAATCCCTCTTCATACCAATCCATA   | AY105 | 6.0   | 0.0  |
| deactivate               | aph6      | CCCATCCCATGTGTAAGGAAA        | GCCACCGCTTCTGCTGTAC           | AY15  | 0.0   | 0.0  |
| deactivate               | sat4      | GAATGGGCAAAGCATAAAAACTTG     | CCGATTTTGAAACCACAATTATGATA    | AY49  | 96.0  | 16.3 |
| deactivate               | spcN      | AAAAGTTCGATGAAACACGCCTAT     | TCCAGTGGTAGTCCCCGAATC         | AY286 | 0.0   | 0.0  |
| deactivate               | spcN      | CAGAATCTTCTGAAAAGTTTGATGAA   | CGCAGACACGCCGAATC             | AY287 | 0.0   | 0.0  |
| deactivate               | str       | AATGAGTTTTGGAGTGTCTCAACGTA   | AATCAAAACCCCTATTAAGCCAAT      | AY175 | 90.0  | 2.2  |
| deactivate               | strA      | CCGGTGGCATTGAGAAAAA          | GTGGCTCAACCTGCGAAAAAG         | AY176 | 90.0  | 10.9 |
| deactivate               | strB      | GCTCGGTCGTGAGAACAATCT        | CAATTTCCGGTCGCCTGGTAGT        | AY177 | 100.0 | 95.7 |
| <b>Amphenicols (AMP)</b> |           |                              |                               |       |       |      |
| deactivate               | catA1     | GGGTGAGTTTACCAGTTTTGATT      | CACCTTGTCGCCTTGCGTATA         | AY130 | 94.0  | 4.3  |
| deactivate               | catB3     | GCACTCGATGCCTTCCAAA          | AGAGCCGATCCAAACGTCAT          | AY51  | 96.0  | 41.3 |

|                          |           |                              |                               |       |      |      |
|--------------------------|-----------|------------------------------|-------------------------------|-------|------|------|
| deactivate               | catB8     | CACTCGACGCCTTCCAAAG          | CCGAGCCTATCCAGACATCATT        | AY52  | 86.0 | 17.4 |
| efflux                   | ceoA      | ATCAACACGGACCAGGACAAG        | GGAAAAGTCCGCTCACGATGA         | AY53  | 0.0  | 0.0  |
| efflux                   | cmlA      | AATTTTGCCGATTATTGCTGAAA      | GATTGTCATCATTCGTTTATCACCAA    | AY20  | 0.0  | 0.0  |
| efflux                   | cmlA      | TAGGAAGCATCGGAACGTTGAT       | CAGACCGAGCACGACTGTTG          | AY127 | 96.0 | 43.5 |
| efflux                   | cmlA      | AGGAAGCATCGGAACGTTGA         | ACAGACCGAGCACGACTGTTG         | AY128 | 56.0 | 40.2 |
| efflux                   | cmlA      | GCGCTCTTCGAGGATTCG           | CCGCCAAGCAGAAGTAGAC           | AY375 | 96.0 | 43.5 |
| efflux                   | cmxA      | GCGATCGCCATCCTCTGT           | TCGACACGGAGCCTTGGT            | AY129 | 86.0 | 35.9 |
| efflux                   | floR      | ATTGTCTTCACGGTGTCGGTTA       | CCGCGATGTCGTCCAAC             | AY56  | 92.0 | 44.6 |
| efflux                   | floR      | TCGTCACTACGGCCTTTTC          | CTTGACTTGATCCAGAGGGC          | AY335 | 8.0  | 0.0  |
| efflux                   | mdtL      | TGCTGATCGGGATTCTGATTG        | CAGGCGCGACGAACATAAT           | AY88  | 96.0 | 33.7 |
| efflux                   | rarD      | GCGGGTGTGGTCACTACGAT         | AGCGTTGGGCCGATATACTG          | AY131 | 28.0 | 1.1  |
| efflux                   | rarD      | TGACGCATCGCGTGATCT           | AAATTTTCTGTGGCGTCTGAATC       | AY132 | 96.0 | 29.3 |
| efflux                   | yidY/mdtL | GCAGTTGCATATCGCCTTCTC        | CTTCCCGCAAACAGCAT             | AY87  | 24.0 | 5.4  |
| <b>Beta-lactams (BL)</b> |           |                              |                               |       |      |      |
| deactivate               | ampC      | GCAGCACGCCCCGTAA             | TGTACCCATGATGCGCGTACT         | AY30  | 86.0 | 23.9 |
| deactivate               | ampC      | AACAAAAGATCCCCGGTATGG        | ACGCCCCGTAATGTTTTGCT          | AY31  | 96.0 | 43.5 |
| deactivate               | ampC      | TCCGGTGACGCGACAGA            | CAGCACGCCGGTGAAAGT            | AY33  | 2.0  | 0.0  |
| deactivate               | ampC      | CCGCCAGAGCAAGGACTA           | GCTCGACTTCACGCCGTAAG          | AY114 | 0.0  | 0.0  |
| deactivate               | ampC      | GCAGCGAAGCGTCAGTCA           | AGATCCGTGGCCGCATAA            | AY258 | 4.0  | 0.0  |
| deactivate               | blaI      | GCAAGTTGAAGCGAAAGAAAAGA      | TACCAGTATCAATCGCATATACACCTAA  | AY39  | 0.0  | 0.0  |
| deactivate               | blaACC    | CACACAGCTGATGGCTTATCTAAAA    | AATAAACCGGATGGGTTC            | AY28  | 0.0  | 0.0  |
| deactivate               | blaACT    | TGGCGTATCGGGTCAATGT          | CTCCACGGGCCAGTTGAG            | AY29  | 12.0 | 0.0  |
| deactivate               | blaACT    | CTGTTTCGAGCTGGGTTCTATAAGTAAA | CAGTATCTGGTACCAGGATCGT        | AY109 | 46.0 | 0.0  |
| deactivate               | blaCMY    | CCGCGGCGAAATTAAGC            | GCCACTGTTTGCCTGTCAGTT         | AY32  | 88.0 | 12.0 |
| deactivate               | blaCMY    | AAAGCCTCATGGGTGCATAAA        | ATAGCTTTTGTGTTGCCAGCATCA      | AY108 | 94.0 | 16.3 |
| deactivate               | blaCMY    | GCGAGCAGCCTGAAGCA            | CGGATGGGCTTGCTCTT             | AY111 | 84.0 | 20.7 |
| deactivate               | blaCTX-M  | GGAGGCGTGACGGCTTTT           | TTCAGTGCATCCAGACGAA           | AY116 | 34.0 | 0.0  |
| deactivate               | blaCTX-M  | GCCGCGGTGCTGAAGA             | ATCGGATTATAGTTAACCAGGTCAGATTT | AY117 | 74.0 | 8.7  |
| deactivate               | blaCTX-M  | CGATACCACCACGCCGTTA          | GCATTGCCAACGTCAGATT           | AY118 | 8.0  | 0.0  |
| deactivate               | blaCTX-M  | CTTGCGTTGCGTGAT              | CGTTCATCGGCACGGTAGA           | AY119 | 18.0 | 6.5  |

|            |                       |                            |                            |       |       |      |
|------------|-----------------------|----------------------------|----------------------------|-------|-------|------|
| deactivate | blaCTX-M              | GCGATAACGTGGCGATGAAT       | GTCGAGACGGAACGTTTCGT       | AY162 | 76.0  | 3.3  |
| deactivate | blaCTX-M              | CACAGTTGGTGACGTGGCTTAA     | CTCCGCTGCCGGTTTTATC        | AY165 | 38.0  | 3.3  |
| deactivate | blaCTX-M              | CGTCACGCTGTTGTTAGGAA       | CGCTCATCAGCACGATAAAG       | AY324 | 84.0  | 7.6  |
| deactivate | blaCTX-M <sup>a</sup> | CGATGTGCAGTACCAGTAA        | GCAATGGGATTGTAGTTAA        | AY326 | 16.0  | 1.1  |
| deactivate | blaCTX-M <sup>a</sup> | CTATGGCACCACCAACGATA       | ACGGCTTTCTGCCTTAGGTT       | AY360 | 84.0  | 7.6  |
| deactivate | blaDHA                | TGGCCGCAGCAGAAAGA          | CCGTTTTATGCACCCAGGAA       | AY112 | 14.0  | 0.0  |
| deactivate | blaFOX                | GGTTTGCCGCTGCAGTTC         | GCGGCCAGGTGACCAA           | AY113 | 38.0  | 45.7 |
| deactivate | blaGES                | GCAATGTGCTCAACGTTCAAG      | GTGCCTGAGTCAATTCTTTCAAAG   | AY120 | 100.0 | 56.5 |
| deactivate | blaIMP                | AACACGGTTTGGTGGTTCTTGTA    | GCGCTCCACAAAACCAATTG       | AY148 | 12.0  | 19.6 |
| deactivate | blaIMP                | AAGGCAGCATTTCTCTCATTTT     | GGATAGATCGAGAATTAAGCCACTCT | AY242 | 8.0   | 46.7 |
| deactivate | blaIMP                | GGAATAGAGTGGCTTAATTC       | GGTTTAACAAAACAACCACC       | AY327 | 6.0   | 23.9 |
| deactivate | blaKPC                | CAGCTCATTCAAGGGCTTTC       | GGCGGCGTTATCACTGTATT       | AY323 | 14.0  | 0.0  |
| deactivate | blaKPC                | GCCGCCGTGCAATACAGT         | GCCGCCAACTCCTTCA           | AY367 | 16.0  | 2.2  |
| deactivate | blaL1                 | CACCGGGTTACCAGCTGAAG       | GCGAAGCTGCGCTTGAGTC        | AY48  | 0.0   | 1.1  |
| deactivate | blaMOX/blaCMY         | CTATGTCAATGTGCCGAAGCA      | GGCTTGTCTCTTTTGAATAGC      | AY34  | 94.0  | 21.7 |
| deactivate | blaNDM                | GGCCACACCAGTGACAATATCA     | CAGGCAGCCACCAAAAGC         | AY362 | 0.0   | 0.0  |
| deactivate | blaOCH                | GGCGACTTGCGCCGTAT          | TTTTCTGCTCGGCCATGAG        | AY35  | 2.0   | 0.0  |
| deactivate | blaOKP                | GCCGCCATCACCATGAG          | GGTGACGTTGTCACCGATCTG      | AY40  | 6.0   | 0.0  |
| deactivate | blaOXA                | CGCAATTATCGGCCTAGAAACT     | TTGGCTTTCCGTCCCATT         | AY44  | 100.0 | 90.2 |
| deactivate | blaOXA                | CGGATGGTTTGAAGGGTTTATTAT   | TCTTGGCTTTTATGCTTGATGTAA   | AY115 | 96.0  | 83.7 |
| deactivate | blaOXA                | GCAATTGCCTTTTAAACCTGA      | CTGCCTTTTCAACAAAACCC       | AY322 | 96.0  | 35.9 |
| deactivate | blaOXA <sup>a</sup>   | CACTTACAGGAACTTGGGGTCG     | AGTGTGTTTAGAATGGTGATC      | AY361 | 96.0  | 78.3 |
| deactivate | blaOXY                | CGTTCAGGCGGCAGGTT          | GCCCGCATATAAGATTTGAGAATT   | AY42  | 18.0  | 0.0  |
| deactivate | blaPDC                | CGCCGTACAACCGGTGAT         | GAAGTAATGCGGTTCTCCTTTCA    | AY36  | 2.0   | 0.0  |
| deactivate | blaPER                | TGCTGGTTGCTGTTTTTGTGA      | CCTGCGCAATGATAGCTTCAT      | AY241 | 80.0  | 9.8  |
| deactivate | blaPSE                | TTGTGACCTATTCCCCTGTAATAGAA | TGCGAAGCACGCATCATC         | AY43  | 70.0  | 10.9 |
| deactivate | blaROB                | GCAAAGGCATGACGATTGC        | CGCGCTGTTGTCGCTAAA         | AY41  | 10.0  | 1.1  |
| deactivate | blaSFO                | CCGCCGCCATCCAGTA           | GGGCCGCCAAGATGCT           | AY121 | 64.0  | 6.5  |
| deactivate | blaSHV                | TCCCATGATGAGCACCTTAAA      | TTCGTCACCGGCATCCA          | AY37  | 96.0  | 6.5  |
| deactivate | blaSHV                | CTTCCCATGATGAGCACCTT       | TCCTGCTGGCGATAGTGGAT       | AY163 | 90.0  | 4.3  |



|                                   |                        |                                  |                               |       |       |      |
|-----------------------------------|------------------------|----------------------------------|-------------------------------|-------|-------|------|
| deactivate                        | blaSHV <sup>a</sup>    | CGCTTCCCATGATGAGCACCTTT          | TCCTGCTGGCGATAGTGGATCTTT      | AY272 | 58.0  | 3.3  |
| deactivate                        | blaSHV                 | GCGTTATTTTCGCCTGTGTA             | AGGTGCTCATCATGGGAAAAG         | AY325 | 76.0  | 0.0  |
| deactivate                        | blaSRT                 | CAGCCGCTGATGAAAAAATATG           | CAGCGAGCCCACTTCGA             | AY259 | 0.0   | 0.0  |
| deactivate                        | blaTEM <sup>a</sup>    | TTCCTGTTTTTGCTCACCCAG            | CTCAAGGATCTTACCCTGTGG         | AY3   | 94.0  | 45.7 |
| deactivate                        | blaTEM                 | AGCATCTTACGGATGGCATGA            | TCCTCCGATCGTTGTCAGAAGT        | AY164 | 96.0  | 53.3 |
| deactivate                        | blaTLA                 | ACACTTGGCATTGCTGTTTATGT          | TGCAAATTTTCGGCAATAATCTTT      | AY122 | 0.0   | 0.0  |
| deactivate                        | blaVEB                 | CCCGATGCAAAGCGTTATG              | GAAAGATTCCCTTTATCTATCTCAGACAA | AY38  | 100.0 | 45.7 |
| deactivate                        | blaVIM                 | GCACTTCTCGCGGAGATTG              | CGACGGTGATGCGTACGTT           | AY147 | 36.0  | 0.0  |
| deactivate                        | blaVIM2 <sup>a</sup>   | CCTCCATTGAGCGGATTCA              | GCCGTGCCCCGGAA                | AY260 | 10.0  | 0.0  |
| deactivate                        | blaZ                   | GGAGATAAAGTAACAAATCCAGTTAGATATGA | TGCTTAATTTTCCATTGCGATAAG      | AY123 | 2.0   | 0.0  |
| deactivate                        | ccrA                   | GCAGCGTTGCTGGACACA               | GTTCGGGATAAACGTGGTGACT        | AY24  | 22.0  | 0.0  |
| deactivate                        | cepA                   | AGTTGCGCAGAACAGTCCTCTT           | TCGTATCTTGCCCCGTCGATAAT       | AY107 | 82.0  | 18.5 |
| deactivate                        | cfxA                   | TCATTCTCGTTCAAGTTTTCAGA          | TGCAGACCAAGAGGAGATGT          | AY106 | 98.0  | 84.8 |
| deactivate                        | cphA                   | GCGAGCTGCACAAGCTGAT              | CGGCCAGTCGCTCTTC              | AY46  | 90.0  | 22.8 |
| deactivate                        | cphA                   | GTGCTGATGGCGAGTTTCTG             | GGTGTGGTAGTTGGTGTGATCAC       | AY47  | 92.0  | 21.7 |
| protection                        | mecA                   | GGTTACGGACAAGGTGAAATACTGAT       | TGCTTTTAATAAGTGAGGTGCGTTAATA  | AY155 | 0.0   | 0.0  |
| protection                        | mecA <sup>a</sup>      | GTTGTAGTTGTCGGGTTTGG             | CTCCACATACCATCTTCTTTAAC       | AY284 | 0.0   | 3.3  |
| protection                        | pbp                    | CCGGTGCCATTGGTTTAGA              | AAAATAGCCGCCCAAGATT           | AY154 | 14.0  | 0.0  |
| protection                        | pbp2x                  | TTTCATAAGTATCTGGACATGGAAGAA      | CCAAAGGAACTTGCTTGAGATTAG      | AY237 | 0.0   | 0.0  |
| protection                        | pbp5                   | GGCGAACTTCTAATTAATCCTATCCA       | CGCCGATGACATTCTTCTTATCTT      | AY153 | 24.0  | 0.0  |
| protection                        | penA                   | AGACGGTAACGTATAACTTTTTGAAAGA     | GCGTGTAGCCGGCAATG             | AY236 | 0.0   | 0.0  |
| deactivate                        | sdeB                   | GGCATGCAGAAAGTGTTTATGC           | TTAAGTGCGGAAGCGGTAGTG         | AY353 | 0.0   | 0.0  |
| <b>Quinolones (QUI)</b>           |                        |                                  |                               |       |       |      |
| efflux                            | pmrA                   | TTTGCAGTTTTTGTTCCTAATGC          | GCAGAGCCTGATTTCTCCTTTG        | AY239 | 0.0   | 0.0  |
| protection                        | qnrA                   | AGGATTTCTCACGCCAGGATT            | CCGCTTTCAATGAAACTGCAA         | AY248 | 14.0  | 1.1  |
| protection                        | qnrB                   | GCGACGTTCAAGTGGTTTCAAGA          | GCTGCTCGCCAGTCGAA             | AY328 | 58.0  | 5.4  |
| protection                        | qnrSrtF11 <sup>a</sup> | GACGTGCTAACTTGCGTGAT             | TGGCATTGTTGGAAACTTG           | AY6   | 96.0  | 56.5 |
| <b>Multidrug Resistance (MDR)</b> |                        |                                  |                               |       |       |      |
| efflux                            | acrA                   | CAACGATCGGACGGGTTTC              | TGGCGATGCCACCGTACT            | AY61  | 92.0  | 8.7  |
| efflux                            | acrA                   | GGTCTATCACCTACGCGCTATC           | GCGCGCACGAACATACC             | AY62  | 80.0  | 12.0 |

|            |           |                                  |                                |       |      |      |
|------------|-----------|----------------------------------|--------------------------------|-------|------|------|
| efflux     | acrA      | CAGACCCGCATCGCATATT              | CGACAATTCGCGCTCATG             | AY249 | 0.0  | 0.0  |
| efflux     | acrA      | TACTTTGCGCGCCATCTTC              | CGTGCGGAAACGAACAT              | AY256 | 28.0 | 2.2  |
| efflux     | acrA      | CGTGCGGAAACGAACA                 | ACTTTGCGCGCCATCTTC             | AY257 | 50.0 | 13.0 |
| efflux     | acrB      | AGTCGGTGTTCGCCGTTAAC             | CAAGGAAACGAACGCAATACC          | AY9   | 96.0 | 23.9 |
| efflux     | acrB      | TGGTAGTGGGCGTCATTAACAC           | GGCAACGTAATCCGAAATATCC         | AY10  | 0.0  | 0.0  |
| efflux     | acrF      | GCGGCCAGGCACAAAA                 | TACGCTCTCCACGGTTTC             | AY11  | 92.0 | 20.7 |
| regulator  | acrR      | GCGCTGGAGACACGACAAC              | GCCTTGCTGCGAGAACAAA            | AY102 | 76.0 | 2.2  |
| regulator  | acrR      | GATGATACCCCTGCTGTGAGA            | ACCAAACAAGAAGCGCAAGAA          | AY103 | 96.0 | 34.8 |
| regulator  | acrR      | TGCAACACGCGCTTTCTC               | ACGATTGCGGGCAGGTT              | AY350 | 22.0 | 17.4 |
| efflux     | adeA      | CAGTTCGAGCGCCTATTTCTG            | CGCCCTGACCGACCAAT              | AY12  | 18.0 | 0.0  |
| efflux     | bexA      | GCGGATCTCTGGTCAGCAA              | TGATTGATGGTTCCCCGTACA          | AY27  | 84.0 | 15.2 |
| protection | cfr       | GCAAAATTCAGAGCAAGTTACGAA         | AAAATGACTCCAACCTGCTTTAT        | AY277 | 0.0  | 0.0  |
| efflux     | cmeA      | GCAGCAAAGAAGAAGCACCAA            | AGCAGGGTAAGTAAACTAAGTGGTAAATCT | AY50  | 0.0  | 0.0  |
| efflux     | cmr       | CGGCATCGTCAGTGGAATT              | CGGTTCCGAAAAAGATGGAA           | AY57  | 0.0  | 0.0  |
| efflux     | emrB/qacA | CTTTTCTCTAACCGTACATTATCTACGATAAA | AGAACGTAGCGACTGATAAAAATGCT     | AY156 | 0.0  | 0.0  |
| efflux     | emrB/qacA | GCAGTAGAAGGAACGATTGTTAGTACAG     | TGCGTAAACCCAGCTAACAAGTT        | AY352 | 0.0  | 0.0  |
| efflux     | emrD      | CTCAGCAGTATGGTGGTAAGCATT         | ACCAGGCGCCGAAGAAC              | AY64  | 16.0 | 0.0  |
| regulator  | marR      | GCGGCGTACTGGTGAAGCTA             | TGCCCTGGTCGTTGATGA             | AY254 | 0.0  | 0.0  |
| regulator  | marR      | TCTGGCGTTAGCTTACCAGTAC           | GTGCAAAGGCTGGATCGAA            | AY255 | 0.0  | 0.0  |
| regulator  | marR      | GCTGTTGATGACATTGCTCACA           | CGGCGTACTGGTGAAGCTAAC          | AY355 | 12.0 | 0.0  |
| efflux     | mdsA      | CGGAGTCCATCGACCATTTG             | ATCGTCGGCAAGGAGAATCA           | AY253 | 0.0  | 0.0  |
| efflux     | mdtA      | CCTAACGGGCGTGACTTCA              | TTCACCTGTTTCAAGGGTCAAA         | AY78  | 0.0  | 0.0  |
| efflux     | mdtE      | CGTCGGCGCACTCGTT                 | TCCAGACGTTGTACGGTAACCA         | AY81  | 84.0 | 16.3 |
| efflux     | mdtF      | CCACCATCGGGCTTTCC                | CCCTTCTTTCTGCATCATCTCA         | AY373 | 96.0 | 32.6 |
| efflux     | mdtG      | TGGCACAAAATATCTGGCAGTT           | TTGTGTGGCGATAAGAGCATTAG        | AY82  | 96.0 | 31.5 |
| efflux     | mdtG      | TTATCTGTTTTCTGCTCACCTTCTTTT      | GCGTGGTGACAAACAGGCTTA          | AY83  | 0.0  | 0.0  |
| efflux     | mdtH      | CGCGTGAAACCTTAAGTGCTT            | AGACGGCTAAACCCCATATAGCT        | AY85  | 96.0 | 26.1 |
| efflux     | mdtH      | CTGCCGTTAAATGGATGTATGC           | ACTCCAGCGGGCGATAGG             | AY86  | 94.0 | 33.7 |
| efflux     | mepA      | ATCGGTGCTCTTCGTTTAC              | ATAAATAGGATCGAGCTGCTGGAT       | AY245 | 8.0  | 5.4  |
| efflux     | mexA      | AGGACAACGCTATGCAACGAA            | CCGAAAGGGCCGAAAT               | AY89  | 4.0  | 0.0  |

|                                                                |            |                                |                             |       |       |       |
|----------------------------------------------------------------|------------|--------------------------------|-----------------------------|-------|-------|-------|
| efflux                                                         | mexB       | CTGGAGATCGACGACGAGAAG          | GAAATCGTTGACGTAGCTGGAA      | AY374 | 6.0   | 0.0   |
| efflux                                                         | mexD       | TTGCCACTGGCTTTCATGAG           | CACTGCGGAGAACTGTCTGTAGA     | AY90  | 0.0   | 0.0   |
| efflux                                                         | mexE       | GGTCAGCACCGACAAGGTCTAC         | AGCTCGACGTACTTGAGGAACAC     | AY246 | 90.0  | 20.7  |
| efflux                                                         | mexF       | CCGCGAGAAGGCCAAGA              | TTGAGTTCGGCGGTGATGA         | AY247 | 46.0  | 37.0  |
| efflux                                                         | mtrC       | GGACGGGAAGATGGTCCAA            | CGTAGCGTTCGGTTCGAT          | AY250 | 0.0   | 0.0   |
| efflux                                                         | mtrD       | TGCGCGTAGTCGTTTCATCTC          | CGTTCCAATTTCTGTATGATTG      | AY230 | 0.0   | 0.0   |
| efflux                                                         | mtrD       | GGTCGGCACGCTCTTGTC             | TGAAGAATTTGCGCACCCTACTAC    | AY232 | 24.0  | 0.0   |
| efflux                                                         | mtrD       | CCGCCAAGCCGATATAGACA           | GGCCGGGTTGCCAAA             | AY233 | 0.0   | 2.2   |
| efflux                                                         | mtrE       | CGATGTGTGCTTTTGGGAAGGT         | CCTGCACCATGATTCCTCAATA      | AY231 | 0.0   | 0.0   |
| efflux                                                         | oprD       | ATGAAGTGGAGCGCCATTG            | GGCCACGGCGAACTGA            | AY234 | 34.0  | 17.4  |
| efflux                                                         | oprJ       | ACGAGAGTGGCGTCGACAA            | AAGGCGATCTCGTTGAGGAA        | AY235 | 44.0  | 23.9  |
| efflux                                                         | qac        | GGAGATTTAGCTCATGTAGCTGAAGAA    | AAGCTGTTTTATCCCCGTAGCTTTA   | AY356 | 4.0   | 1.1   |
| efflux                                                         | qacA/qacB  | TGGCAATAGGAGCTATGGTGTTT        | AAGGTAACACTATTTTCGGTCCAAATC | AY262 | 2.0   | 0.0   |
| efflux                                                         | qacEdelta1 | TCGCAACATCCGCATTAATA           | ATGGATTTTCCAGAACAGAGAAAGAAA | AY126 | 100.0 | 97.8  |
| efflux                                                         | qacEdelta1 | CCCCTTCCGCCGTTGT               | CGACCAGACTGCATAAGCAACA      | AY159 | 100.0 | 98.9  |
| efflux                                                         | qacEdelta1 | GTCGGTGTGCTTATGCAGTCT          | CAACCAGGCAATGGCTGTAA        | AY351 | 100.0 | 100.0 |
| efflux                                                         | qacG       | CAATAATAACCGAAATAATAGGGACAAGTT | AATAAGTGTTCCTAGTGTGGCCATAG  | AY261 | 0.0   | 0.0   |
| efflux                                                         | qacH       | GTGGCAGCTATCGCTTGAT            | CCAACGAACGCCACAA            | AY124 | 88.0  | 47.8  |
| efflux                                                         | qacH       | CATCGTGCTTGTGGCAGCTA           | TGAACGCCCAGAAGTCTAGTTTT     | AY125 | 100.0 | 94.6  |
| efflux                                                         | sdeB       | CACTACCGCTCCGCACTTAA           | TGAAAAAACGGGAAAAGTCCAT      | AY160 | 0.0   | 0.0   |
| efflux                                                         | tolC       | GGCCGAGAACCTGATGCA             | AGACTTACGCAATTCCGGGTTA      | AY298 | 96.0  | 32.6  |
| efflux                                                         | tolC       | CAGGCAGAGAACCTGATGCA           | CGCAATTCGGGTTGCT            | AY299 | 68.0  | 3.3   |
| efflux                                                         | tolC       | GCCAGGCAGAGAACCTGATG           | CGCAATTCGGGTTGCT            | AY300 | 66.0  | 6.5   |
| efflux                                                         | ttgA       | ACGCCAATGCCAAACGATT            | GTCACGGCGCAGCTTGA           | AY243 | 50.0  | 9.8   |
| efflux                                                         | ttgB       | TCGCCCTGGATGTACACCTT           | ACCATTGCCGACATCAACAAC       | AY244 | 90.0  | 34.8  |
| efflux                                                         | yceL/mdtH  | TCGGGATGGTGGGCAAT              | CGATAACCGAGCCGATGTAGA       | AY84  | 0.0   | 0.0   |
| <b>Macrolide-Lincosamide-Streptogramin B (MLS<sub>B</sub>)</b> |            |                                |                             |       |       |       |
| efflux                                                         | carB       | GGAGTGAGGCTGACCGTAGAAG         | ATCGGCGAAACGCACAAA          | AY288 | 0.0   | 0.0   |
| deactivate                                                     | ereA       | CCTGTGGTACGGAGAATTCATGT        | ACCGCATTCGCTTTGCTT          | AY60  | 100.0 | 58.7  |
| deactivate                                                     | ereB       | GCTTTATTTTCAGGAGGCGGAAT        | TTTTAAATGCCACAGCACAGAATC    | AY63  | 72.0  | 4.3   |

|            |            |                                 |                                |       |       |      |
|------------|------------|---------------------------------|--------------------------------|-------|-------|------|
| protection | erm34      | GCGCGTTGACGACGATTT              | TGGTCATACTCGACGGCTAGAAC        | AY134 | 0.0   | 0.0  |
| protection | erm(35)    | TTGAAAACGATGTTGCATTAAGTCA       | TCTATAATCACAACCTAACCCTTGAACGT  | AY21  | 28.0  | 3.3  |
| protection | erm(36)    | GGCGGACCGACTTGCAT               | TCTGCGTTGACGACGGTTAC           | AY91  | 0.0   | 0.0  |
| protection | ermA       | TTGAGAAGGGATTTGCGAAAAG          | ATATCCATCTCCACCATTAATAGTAAACC  | AY274 | 2.0   | 2.2  |
| protection | ermA/ermTR | ACATTTTACCAAGGAACCTGTGGAA       | GTGGCATGACATAAACCTTCATCA       | AY283 | 2.0   | 0.0  |
| protection | ermB       | TAAAGGGCATTTAACGACGAAACT        | TTTATACCTCTGTTTGTAGGGAATTGAA   | AY136 | 96.0  | 82.6 |
| protection | ermC       | TTTGAAAATCGGCTCAGGAAAA          | ATGGTCTATTTCAATGGCAGTTACG      | AY275 | 2.0   | 4.3  |
| protection | ermD       | GGA CT CGGCAATGGTCAGAA          | CCCCGAAACGCAATATAATGTT         | AY18  | 0.0   | 0.0  |
| protection | ermF       | CAGCTTTGGTTGAACATTTACGAA        | AAATTCCTAAAATCACAACCGACAA      | AY23  | 100.0 | 94.6 |
| protection | ermK       | GTTTGATATTGGCATTGTCAGAGAAA      | ACCATTGCCGAGTCCACTTT           | AY17  | 0.0   | 0.0  |
| protection | ermK       | GAGCCGCAAGCCCC TTT              | GTGTTTCATTTGACGCGGAGTAA        | AY19  | 0.0   | 0.0  |
| protection | ermT       | GTTCACTAGCACTATTTTTAATGACAGAAGT | GAAGGGTGTCTTTTTAATACAATTAACGA  | AY137 | 38.0  | 2.2  |
| protection | ermT       | GTAAAATCCCTAGAGAATACTTTCATCCA   | TGAGTGATATTTTTGAAGGGTGTCTT     | AY238 | 36.0  | 2.2  |
| protection | ermX       | GCTCAGTGGTCCCCATGGT             | ATCCCCCGTCAACGTTT              | AY209 | 86.0  | 7.6  |
| protection | ermY       | TTGTCTTTGAAAGTGAAGCAACAGT       | TAACGCTAGAGAACGATTTGTATTGAG    | AY270 | 0.0   | 0.0  |
| efflux     | lmrA       | TTCAGATGCAATGGCGTTTG            | ATAATCGGGAACATAATGAGCATAACTAC  | AY77  | 58.0  | 0.0  |
| efflux     | lmrA       | TCGACGTGACCGTAGTGAACA           | CGTGACTACCCAGGTGAGTTGA         | AY252 | 0.0   | 0.0  |
| deactivate | lnuA       | TGACGCTCAACACACTCAAAAA          | TTCATGCTTAAGTTCCATACGTGAA      | AY251 | 24.0  | 0.0  |
| deactivate | lnuB       | TGAACATAATCCCCTCGTTTAAAGAT      | TAATTGCCCTGTTTCATCGTAAATAA     | AY67  | 96.0  | 62.0 |
| deactivate | lnuB       | AAAGGAGAAGGTGACCAATACTCTGA      | GGAGCTACGTCAAACAACCAGTT        | AY68  | 96.0  | 67.4 |
| deactivate | lnuC       | TGGTCAATATAACAGATGTAAACCAGATTT  | CACCCCAGCCACCATCAA             | AY278 | 0.0   | 3.3  |
| efflux     | matA/mel   | TAGTAGGCAAGCTCGGTGTTGA          | CCTGTGCTATTTTAAGCCTTGTCTTCT    | AY139 | 100.0 | 82.6 |
| efflux     | mefA       | CCGTAGCATTGGAACAGCTTTT          | AAACGGAGTATAAGAGTGCTGCAA       | AY146 | 96.0  | 83.7 |
| deactivate | mphA       | CTGACGCGCTCCGTGTT               | GGTGGTGCATGGCGATCT             | AY140 | 66.0  | 22.8 |
| deactivate | mphA       | TGATGACCCTGCCATCGA              | TTCGCGAGCCCCTCTTC              | AY142 | 70.0  | 28.3 |
| deactivate | mphB       | CGCAGCGCTTGATCTTGTAG            | TTACTGCATCCATACGCTGCTT         | AY141 | 14.0  | 0.0  |
| deactivate | mphC       | CGTTTGAAGTACCGAATTGGAAA         | GCTGCGGGTTTGCCTGTA             | AY273 | 0.0   | 0.0  |
| efflux     | msrA       | CTGCTAACACAAGTACGATTCCAAAT      | TCAAGTAAAGTTGTCTTACCTACACCATT  | AY149 | 0.0   | 0.0  |
| efflux     | msrA       | AACGAAATCAAGCGCAACAA            | CAACCGTGCCTTTTTCTTTTG          | AY276 | 0.0   | 3.3  |
| efflux     | msrC       | TCAGACCGGATCGGTTGTC             | CCTATTTTTTGGAGTCTTCTCTCTAATGTT | AY138 | 22.0  | 0.0  |

|                            |                   |                              |                             |       |       |       |
|----------------------------|-------------------|------------------------------|-----------------------------|-------|-------|-------|
| efflux                     | msrC              | GAATCACTTGTCGCAGTTTGT        | CGTACACAACGGTTTCGTCAGA      | AY150 | 0.0   | 0.0   |
| efflux                     | oleC              | CCCGGAGTCGATGTTCGA           | GCCGAAGACGTACACGAACAG       | AY285 | 0.0   | 3.3   |
| protection                 | pikR1             | TCGACATGCGTGACGAGATT         | CCGCGAATTAGGCCAGAA          | AY289 | 0.0   | 0.0   |
| protection                 | pikR2             | TCGTGGGCCAGGTGAAGA           | TTCCCCCTGCCGGTGAA           | AY290 | 0.0   | 0.0   |
| protection                 | pncA              | GCAATCGAGGCGGTGTTC           | TTGCCGCAGCCAATTCA           | AY229 | 2.0   | 5.4   |
| deactivate                 | vatB              | GGAAAAAGCAACTCCATCTCTTGA     | TCCTGGCATAACAGTAACATTCTGA   | AY224 | 4.0   | 0.0   |
| deactivate                 | vatB              | TTGGGAAAAAGCAACTCCATCT       | CAATCCACACATCATTTCACA       | AY266 | 4.0   | 0.0   |
| deactivate                 | vatC              | CGATGTTTGATTGGACGAGAT        | GCTGCAATAATAGCCCCGTTT       | AY267 | 0.0   | 0.0   |
| deactivate                 | vatC              | CGGAAATTGGGAACGATGTT         | GCAATAATAGCCCCGTTTCCTA      | AY225 | 0.0   | 0.0   |
| deactivate                 | vatD              | TGCAATAGTAGCTGCTAATTCTGTTGTT | TGTTTTATTCGTTAGCAGGATTTC    | AY73  | 0.0   | 0.0   |
| deactivate                 | vatE              | GGTGCCATTATCGGAGCAAAT        | TTGGATTGCCACCGACAAT         | AY74  | 0.0   | 0.0   |
| deactivate                 | vatE              | GACCGTCCTACCAGGCGTAA         | TTGGATTGCCACCGACAATT        | AY263 | 0.0   | 0.0   |
| deactivate                 | vgb               | AGGGAGGGTATCCATGCAGAT        | ACCAAATGCGCCCCGTTT          | AY144 | 0.0   | 0.0   |
| deactivate                 | vgb               | CCACGATGGCTGCCTTTG           | GGCCATGCAGGACGGATAT         | AY145 | 0.0   | 0.0   |
| efflux                     | vgaA              | CGAGTATTGTGGAAAGCAGTAGTT     | CCCGTACCGTTAGAGCCGATA       | AY226 | 0.0   | 0.0   |
| efflux                     | vgaA              | GACGGGTATTGTGGAAAGCAA        | TTTCCTGTACCATTAGATCCGATAATT | AY265 | 0.0   | 0.0   |
| efflux                     | vgaB              | TAAAAGAGAATAAGGCGCAAGGA      | TGTTTAGTAGCATGTTGCATTTTCC   | AY227 | 4.0   | 0.0   |
| efflux                     | vgaB              | GAATGATTAAGCCCCCTTCAAAA      | ATTCGTGTTTCCAACGATTTCG      | AY264 | 2.0   | 0.0   |
| deactivate                 | vgbA              | ATACGAGCTGCCTAATAAAGGATCTT   | TGTGAACCACAGGGCATTATCA      | AY269 | 0.0   | 0.0   |
| deactivate                 | vgbB              | CAGCCGGATTCTGGTCCTT          | TACGATCTCCATTCAATTGGGTAAA   | AY268 | 0.0   | 0.0   |
| <b>Sulphonamides (SUL)</b> |                   |                              |                             |       |       |       |
| protection                 | folA              | CGAGCAGTTCCTGCCAAAG          | CCCAGTCATCCGGTTCATAATC      | AY208 | 4.0   | 0.0   |
| protection                 | folP              | CAGGCTCGTAAATTGATAGCAGAAG    | CTTTCCTTGCGAATCGCTTT        | AY280 | 10.0  | 3.3   |
| protection                 | folP              | GCGATTGCAAGGAAAGTGA          | CACATGGGCCATTTTTTCATC       | AY281 | 10.0  | 0.0   |
| protection                 | folP              | CACGGCTTCGGCTCATGT           | TGCCATCCTGTGACTAGCTACGT     | AY282 | 6.0   | 0.0   |
| protection                 | sul1 <sup>a</sup> | CGCACCGGAAACATCGCTGCAC       | TGAAGTTCGCCCGCAAGGCTCG      | AY110 | 90.0  | 70.7  |
| protection                 | sul1              | CAGCGCTATGCGCTCAAG           | ATCCCCTGCGCTGAGT            | AY178 | 0.0   | 0.0   |
| protection                 | sul1              | GCCGATGAGATCAGACGTATTG       | CGCATAGCGCTGGGTTTC          | AY363 | 100.0 | 100.0 |
| protection                 | sul2              | TCATCTGCCAAACTCGTCGTTA       | GTCAAAGAACGCCGCAATGT        | AY133 | 96.0  | 95.7  |
| protection                 | sul2              | TCCGATGGAGGCCGGTATCTGG       | CGGGAATGCCATCTGCCTTGAG      | AY332 | 94.0  | 89.1  |

|                           |         |                                    |                              |       |       |      |
|---------------------------|---------|------------------------------------|------------------------------|-------|-------|------|
| protection                | sul3    | TCCGTTTCAGCGAATTGGTGCAG            | TTCGTTTCAGCCTTACACCAGC       | AY333 | 28.0  | 3.3  |
| <b>Tetracycline (TET)</b> |         |                                    |                              |       |       |      |
| protection                | tet(32) | CCATTACTTCGGACAACGGTAGA            | CAATCTCTGTGAGGGCATTTAACA     | AY54  | 96.0  | 69.6 |
| deactivate                | tet34   | CTTAGCGCAAACAGCAATCAGT             | CGGTGATACAGCGGTAAACT         | AY321 | 0.0   | 0.0  |
| efflux                    | tet35   | ACCCCATGACGTACCTGTAGAGA            | CAACCCACACTGGCTACCAGTT       | AY320 | 0.0   | 0.0  |
| protection                | tet(36) | AGAATACTCAGCAGAGGTCAGTTCCT         | TGGTAGGTCGATAACCCGAAAAT      | AY22  | 46.0  | 2.2  |
| protection                | tet36   | TGCAGGAAAGACCTCCATTACAG            | CTTTGTCCACACTTCCACGTACTATG   | AY301 | 68.0  | 4.3  |
| deactivate                | tet37   | GAGAACGTTGAAAAGGTGGTGAA            | AACCAAGCCTGGATCAGTCTCA       | AY302 | 0.0   | 0.0  |
| efflux                    | tet38   | TTAATGTGGCGGTATCTGTAGGTATT         | TTGCCTGGGAAATTTAATGCTTT      | AY271 | 0.0   | 0.0  |
| efflux                    | tetA    | GCTGTTTGTCTGCCGAAA                 | GGTTAAGTTCCTTGAACGAAACT      | AY13  | 0.0   | 0.0  |
| efflux                    | tetA    | CTCACCAGCCTGACCTCGAT               | CACGTTGTTATAGAAGCCGCATAG     | AY180 | 98.0  | 62.0 |
| efflux                    | tetA/B  | AGTGCGCTTTGGATGCTGTA               | AGCCCCAGTAGCTCCTGTGA         | AY181 | 90.0  | 5.4  |
| efflux                    | tetA/B  | GCCCAGTGCTGTTGTTGTCAT              | TGAAAGCAAACGGCCTAAATACA      | AY190 | 94.0  | 8.7  |
| efflux                    | tetA(P) | AGTTGCAGATGTGTATAGTCGTAACCTATCTATT | TGCTACAAGTACGAAAACTAGAA      | AY55  | 62.0  | 23.9 |
| efflux                    | tetC    | CATATCGCAATACATGCGAAAAA            | AAAGCCGCGTAAATAGCAA          | AY182 | 90.0  | 4.3  |
| efflux                    | tetC    | ACTGGTAAGGTAAACGCCATTGTC           | ATGCATAAACCCAGCCATTGAGTAAG   | AY199 | 92.0  | 3.3  |
| efflux                    | tetC    | TGCGTTGATGCAATTTCTATGC             | GGAATGGTGCATGCAAGGAG         | AY330 | 98.0  | 81.5 |
| efflux                    | tetD    | TGCCGCGTTTGATTACACA                | CACCAGTGATCCCCGGAGATAA       | AY92  | 20.0  | 0.0  |
| efflux                    | tetD    | TGTCATCGCGCTGGTGATT                | CATCCGCTTCCGGGAGAT           | AY188 | 4.0   | 0.0  |
| efflux                    | tetD    | CTGGACGCGATGGGAATT                 | TCCGCTTCCGGGAGATATT          | AY349 | 24.0  | 0.0  |
| efflux                    | tetE    | TTGGCGCTGTATGCAATGAT               | CGACGACCTATGCGATCTGA         | AY291 | 96.0  | 67.4 |
| efflux                    | tetG    | TCAACCATTGCCGATTCGA                | TGGCCCCGGAATCATG             | AY183 | 88.0  | 64.1 |
| efflux                    | tetG    | CATCAGCGCCGGTCTTATG                | CCCCATGTAGCCGAACCA           | AY189 | 92.0  | 89.1 |
| efflux                    | tetH    | TTTGGGTCATCTTACCAGCATTA            | TTGCGCATTATCATCGACAGA        | AY187 | 64.0  | 2.2  |
| efflux                    | tetJ    | GGGTGCCGATTAGATTACCT               | TCGTCCAATGTAGAGCATCCATA      | AY240 | 0.0   | 0.0  |
| efflux                    | tetK    | CAGCAGTCATTGGAAAATTATCTGATTATA     | CCTTGTAACCTACCAAAAATCAAAAATA | AY184 | 0.0   | 0.0  |
| efflux                    | tetL    | AGCCCGATTTATTCAAGGAATTG            | CAAATGCTTTCCCCCTGTTCT        | AY194 | 0.0   | 0.0  |
| efflux                    | tetL    | ATGGTTGTAGTTGCGCGCTATAT            | ATCGCTGGACCGACTCCTT          | AY195 | 54.0  | 3.3  |
| protection                | tetM    | CATCATAGACAGCCAGGACATAT            | CGCCATCTTTTGCAGAAATCA        | AY186 | 100.0 | 78.3 |
| protection                | tetM    | TAATATTGGAGTTTATAGCTCATGTTGATG     | CCTCTCTGACGTTCTAAAAGCGTATTAT | AY193 | 96.0  | 65.2 |

|                         |                      |                                |                               |       |       |      |
|-------------------------|----------------------|--------------------------------|-------------------------------|-------|-------|------|
| protection              | tetM                 | GCAATTCTACTGATTTCGTC           | CTGTTTGATTACAATTTCCGC         | AY329 | 98.0  | 43.5 |
| protection              | tetM <sup>a</sup>    | GCAATTCTACTGATTTCGTC           | CTGTTTGATTACAATTTCCGC         | AY357 | 58.0  | 31.5 |
| protection              | tetO                 | ATGTGGATACTACAACGCATGAGATT     | TGCCTCCACATGATATTTTTCCT       | AY179 | 98.0  | 83.7 |
| protection              | tetO                 | CAACATTAACGGAAAGTTTATTGTATACCA | TTGACGCTCCAAATTCATTGTATC      | AY192 | 98.0  | 79.3 |
| protection              | tetPB                | ACACCTGGACACGCTGATTTT          | ACCGTCTAGAACGCGGAATG          | AY292 | 0.0   | 1.1  |
| protection              | tetPB                | TGATACACCTGGACACGCTGAT         | CGTCCAAAACGCGGAATG            | AY293 | 0.0   | 0.0  |
| protection              | tetPB                | TGGGCGACAGTAGGCTTAGAA          | TGACCCTACTGAAACATTAGAAAATACCT | AY294 | 46.0  | 19.6 |
| protection              | tetPB                | AGTGGTGCAAATACTGAAAAAGTTGT     | TTTGTTCCTTCGTTTTGGACAGA       | AY295 | 0.0   | 0.0  |
| protection              | tetPB                | CTGAAGTGGAGCGATCATTCC          | CCCTCAACGGCAGAAATAACTAA       | AY296 | 0.0   | 0.0  |
| protection              | tetQ                 | CGCCTCAGAAGTAAGTTCATACACTAAG   | TCGTTCATGCGGATATTATCAGAAT     | AY185 | 100.0 | 89.1 |
| regulator               | tetR                 | ATGAGTTCGGCCAGAATTTCC          | GGTTGTGCGCGAAATGATT           | AY135 | 0.0   | 0.0  |
| regulator               | tetR                 | CGCGATAGACGCCTTCGA             | TCCTGACAACGAGCCTCCTT          | AY197 | 98.0  | 50.0 |
| regulator               | tetR                 | CGCGATGGAGCAAAAGTACAT          | AGTGAAAAACCTTGTTGGCATAAAA     | AY198 | 94.0  | 5.4  |
| regulator               | tetR                 | CAATCCATCGACAATCAC             | GACAATCAGCTACTTCAC            | AY381 | 90.0  | 37.0 |
| protection              | tetS                 | TTAAGGACAAACTTTCTGACGACATC     | TGTCTCCATTGTTCTGGTTCA         | AY200 | 58.0  | 0.0  |
| protection              | tetT                 | CCATATAGAGGTTCCACCAAATCC       | TGACCCTATTGGTAGTGGTTCTATTG    | AY297 | 42.0  | 3.3  |
| unknown                 | tetU                 | GTGGCAAAGCAACGGATTG            | TGCGGGCTTGCAAAACTATC          | AY69  | 6.0   | 0.0  |
| unknown                 | tetU                 | AACAGCGGGTTAAGTGTGCAA          | ATGGTATCATTAGTTTTCCGACAAT     | AY70  | 0.0   | 0.0  |
| efflux                  | tetV                 | GCGGGAACGACGATGTATATC          | CCGCTATCTCACGACCATGAT         | AY228 | 0.0   | 0.0  |
| protection              | tetW                 | ATGAACATCCCACCGTTATCTTT        | ATATCGGCGGAGAGCTTATCC         | AY191 | 98.0  | 91.3 |
| deactivate              | tetX                 | AAATTTGTTACCGACACGGAAGTT       | CATAGCTGAAAAAATCCAGGACAGTT    | AY196 | 98.0  | 88.0 |
| <b>Vancomycin (VAN)</b> |                      |                                |                               |       |       |      |
| protection              | vanA                 | AAAAGGCTCTGAAAACGCAGTTAT       | CGGCCGTTATCTTGTA AAAACAT      | AY210 | 2.0   | 0.0  |
| protection              | vanA <sup>a</sup>    | TCTGCAATAGAGATAGCCGC           | GGAGTAGCTATCCAGCATT           | AY368 | 2.0   | 0.0  |
| protection              | vanA3FP <sup>a</sup> | CTGTGAGGTCGGTTGTGCG            | TTTGGTCCACCTCGCCA             | AY4   | 12.0  | 27.2 |
| protection              | vanB                 | TTGTCCGGCGAAGTGGATCA           | AGCCTTTTTCCGGCTCGTT           | AY211 | 0.0   | 0.0  |
| protection              | vanB                 | CCGGTCGAGGAACGAAATC            | TCCTCCTGCAAAAAAAGATCAAC       | AY212 | 8.0   | 0.0  |
| protection              | vanB                 | GGCTGTTTCGGGCTGTGA             | AACAATAACGCGGCACTGTT          | AY354 | 2.0   | 0.0  |
| protection              | vanC                 | ACAGGGATTGGCTATGAACCAT         | TGACTGGCGATGATTTGACTATG       | AY66  | 10.0  | 0.0  |
| protection              | vanC                 | CCTGCCAATCGATCGTT              | CGGCTTCATTCCGGCTTGATA         | AY71  | 0.0   | 0.0  |

|            |             |                                |                             |       |      |      |
|------------|-------------|--------------------------------|-----------------------------|-------|------|------|
| protection | vanC        | AAATCAATACTATGCCGGGCTTT        | CCGACCGCTGCCATCA            | AY72  | 48.0 | 34.8 |
| protection | vanC        | AGGCGATAGCGGGTATTGAA           | CAATCGTCAATTGCTCATTTCC      | AY303 | 0.0  | 0.0  |
| protection | vanC2/vanC3 | TTTGA CTGT CCGTGT TGTGA        | TCAATCGTTTCAGGCAATGG        | AY304 | 28.0 | 0.0  |
| protection | vanD        | CAGAGGAACATAATGTTTCGATAAAAATCT | GCCGGATTTTGTGATTCCAA        | AY213 | 10.0 | 0.0  |
| protection | vanG        | ATTTGAATTGGCAGGTATACAGGTTA     | TGATTTGTCTTTGTCCATACATAATGC | AY305 | 0.0  | 0.0  |
| protection | vanHB       | GAGGTTTCCGAGGCGACAA            | CTCTCGGCGGCAGTCGTAT         | AY215 | 4.0  | 3.3  |
| protection | vanHD       | GTGGCCGATTATACCGTCATG          | CGCAGGTCATTCAGGCAAT         | AY214 | 6.0  | 0.0  |
| protection | vanRA       | CCCTTACTCCCACCGAGTTTT          | TTCGTGCCCCATATCTCAT         | AY216 | 2.0  | 0.0  |
| protection | vanRA       | CCACTCCGGCCTTGTCATT            | GCTAACACATTCCCCTTGTTTT      | AY217 | 2.0  | 0.0  |
| protection | vanRB       | GCCCTGTCCGATGACGAA             | TTACATAGTCGTCTGCCTCTGCAT    | AY306 | 0.0  | 0.0  |
| protection | vanRC       | TGCGGGA AAAACTGAACGA           | CCCCCATAACGGTTTTGATTA       | AY307 | 0.0  | 0.0  |
| protection | vanRC4      | AGTGCTTTGGCTTATCTCGAAAA        | TCCGGCAGCATCACATCTAA        | AY308 | 20.0 | 0.0  |
| protection | vanRD       | TTATAATGGCAAGGATGCACTAAAGT     | CGTCTACATCCGGAAGCATGA       | AY309 | 4.0  | 0.0  |
| protection | vanSA       | CGCGTCATGCTTTCAAAAATTC         | TCCGCAGAAAAGCTCAATTTGTT     | AY218 | 2.0  | 0.0  |
| protection | vanSB       | GCGCGGCAAATGACAAC              | TTTGCCATTTTATTCGCACTGT      | AY310 | 8.0  | 3.3  |
| protection | vanSC       | ATCAACTGCGGGAGAAAAGTCT         | TCCGCTGTTCCGCTTCTT          | AY311 | 0.0  | 0.0  |
| protection | vanSC       | GCCATCAGCGAGTCTGATGA           | CAGCTGGGATCGTTTTTCCTT       | AY312 | 2.0  | 0.0  |
| protection | vanSE       | TGGCCGAAGAAGCAGGAA             | CAATAATACTCGTCAAAGGAGTTCTCA | AY313 | 0.0  | 0.0  |
| protection | vanTC       | CACACGCATTTTTTCCCATCTAG        | CAGCCAACAGATCATCAAAAACAA    | AY161 | 18.0 | 0.0  |
| protection | vanTC       | GTGGTGCCAAGGAAGTTGCT           | CGTAGCCACCGCAAAAAAAT        | AY314 | 0.0  | 0.0  |
| protection | vanTC       | ACAGTTGCCGCTGGTGAAG            | CGTGGCTGGTTCGATCAAAA        | AY315 | 4.0  | 0.0  |
| protection | vanTG       | CGTG TAGCCGTTCCGTTCTT          | CGGCATTACAGGTATATCTGGAAA    | AY316 | 40.0 | 0.0  |
| protection | vanWB       | CGGACAAAGATACCCCCTATAAAG       | AAATAGTAAATTGCTCATCTGGCACAT | AY220 | 8.0  | 0.0  |
| protection | vanWG       | ACATTTTCATTTTGGCAGCTTGTAC      | CCGCATAAGAGCCTACAATCT       | AY219 | 54.0 | 0.0  |
| protection | vanXA       | CGCTAAATATGCCACTTGGGATA        | TCAAAAAGCGATTCAGCCTACT      | AY221 | 2.0  | 0.0  |
| protection | vanXB       | AGGCACAAAATCGAAGATGCTT         | GGGTATGGCTCATCAATCAACTT     | AY223 | 16.0 | 0.0  |
| protection | vanXD       | TAAACCGTGTTATGGGAACGAA         | GCGATAGCCGTCCATAAGA         | AY222 | 4.0  | 0.0  |
| protection | vanYB       | GGCTAAAGCGGAAGCAGAAA           | GATATCCACAGCAAGACCAAGCT     | AY317 | 4.0  | 0.0  |
| protection | vanYD       | AAGGCGATACCCTGACTGTCA          | ATTGCCGGACGGAAGCA           | AY318 | 10.0 | 0.0  |
| protection | vanYD       | CAAACGGAAGAGAGGTCACTTACA       | CGGACGGTAATAGGGACTGTTC      | AY319 | 8.0  | 0.0  |



| <b>Other</b>       |                    |                                |                              |       |       |      |
|--------------------|--------------------|--------------------------------|------------------------------|-------|-------|------|
| protection         | mcr-1 <sup>a</sup> | ACACTTATGGCACGGTCTATG          | GCACACCCAAACCAATGATAC        | AY80  | 0.0   | 0.0  |
| deactivate         | dfrA1              | GGAATGGCCCTGATATTCCA           | AGTCTTGCCTCCAACCAACAG        | AY58  | 96.0  | 48.9 |
| deactivate         | dfrA1              | TTCAGGTGGTGGGGAGATATAC         | TTAGAGGGCGAAGTCTTGGGTAA      | AY334 | 0.0   | 0.0  |
| deactivate         | dfrA12             | CCTCTACCGAACCGTCACACA          | GCGACAGCGTTGAAACAACACTAC     | AY59  | 86.0  | 12.0 |
| deactivate         | merA               | GTGCCGTCCAAGATCATG             | GGTGGAAAGTCCAGTAGGGTGA       | AY331 | 82.0  | 82.6 |
| deactivate         | bacA               | CGGCTTCGTGACCTCGTT             | ACAATGCGATACCAGGCAAAT        | AY157 | 10.0  | 1.1  |
| deactivate         | bacA               | TTCCACGACACGATTAAGTCATTG       | CGGCTCTTTCGGCTTCAG           | AY158 | 96.0  | 34.8 |
| protection         | fabK               | TTTCAGCTCAGCACTTTGGTCAT        | AAGGCATCTTTTCAGCCAGTTC       | AY279 | 0.0   | 3.3  |
| deactivate         | fosB               | TCACTGTAACATAATGAAGCATTAGACCAT | CCATCTGGATCTGTAAAGTAAAGAGATC | AY143 | 0.0   | 0.0  |
| deactivate         | fosX               | GATTAAGCCATATCACTTTAATTGTGAAAG | TCTCCTTCCATAATGCAAATCCA      | AY76  | 0.0   | 0.0  |
| regulator          | imiR               | CCGGACTAGAGCTTCATGTAAGC        | CCCACGCGGTACTCTTGTAAG        | AY65  | 0.0   | 0.0  |
| deactivate         | nimE               | TGCGCCAAGATAGGGCATA            | GTCGTGAATTCGGCAGGTTTA        | AY152 | 50.0  | 0.0  |
| deactivate         | nisB               | GGGAGAGTTGCCGATGTTGTA          | AGCCACTCGTTAAAGGGCAAT        | AY79  | 6.0   | 0.0  |
| deactivate         | nisB               | CGGTTGAACGGCGTGAA              | TTTCCACCCAGGTTTGCTACTATT     | AY348 | 14.0  | 0.0  |
| deactivate         | yyaR               | CCGTTGCAAGAAGATTATAGAAAAA      | CAAGCATAAGACCGCATAAATGAT     | AY16  | 0.0   | 0.0  |
| <b>Integrase</b>   |                    |                                |                              |       |       |      |
| MGE                | intI1 <sup>a</sup> | GATCGGTGCAATGCGTGT             | GCCTTGATGTTACCCGAGAG         | AY45  | 100.0 | 97.8 |
| MGE                | intI1              | CGAAGTCGAGGCATTTCTGTG          | GCCTTCCAGAAAACCGAGGA         | AY336 | 100.0 | 97.8 |
| MGE                | intI1              | GCCTTGATGTTACCCGAGAG           | GATCGGTGCAATGCGTGT           | AY337 | 96.0  | 95.7 |
| MGE                | intI1              | CGAACGAGTGGCGGAGGGTG           | TACCCGAGAGCTTGGCACCCA        | AY359 | 96.0  | 94.6 |
| MGE                | intI1              | CTGGATTTGATCACGGCACG           | ACATGCGTGTAATCATCGTCG        | AY364 | 86.0  | 84.8 |
| MGE                | intI2              | TGCTTTTCCCACCTTACC             | GACGGCTACCTCTGTTATCTC        | AY338 | 96.0  | 15.2 |
| MGE                | intI3              | GCCACCACTTGTGAGGA              | GGATGTCTGTGCCTGCTTG          | AY339 | 94.0  | 66.3 |
| <b>Transposase</b> |                    |                                |                              |       |       |      |
| MGE                | IS613              | AGGTTCCGGACTCAATGCAACA         | TTCAGCACATACCGCCTTGAT        | AY26  | 68.0  | 75.0 |
| MGE                | tnpA               | GCCGCACTGTCGATTTTATC           | GCGGGATCTGCCACTTCTT          | AY201 | 100.0 | 92.4 |
| MGE                | tnpA               | CCGATCACGAAAGCTCAAG            | GGCTCGCATGACTTCGAATC         | AY202 | 98.0  | 95.7 |
| MGE                | tnpA               | GGGCGGGTCGATTGAAA              | GTGGGCGGGATCTGCTT            | AY203 | 92.0  | 90.2 |
| MGE                | tnpA               | CATCATCGGACGGACAGAATT          | GTCGGAGATGTGGGTGTAGAAAGT     | AY204 | 90.0  | 78.3 |

|                             |            |                            |                                |       |       |       |
|-----------------------------|------------|----------------------------|--------------------------------|-------|-------|-------|
| MGE                         | tnpA       | GAAACCGATGCTACAATATCCAATTT | CAGCACCGTTTGCAGTGTAAG          | AY205 | 100.0 | 91.3  |
| MGE                         | tnpA       | TGCAGATGGTTAACCTTGGATATTT  | TCGGTTCATCAAACCTGCTTCAC        | AY206 | 96.0  | 66.3  |
| MGE                         | tnpA       | AATTGATGCGGACGGCTTAA       | TCACCAAACCTGTTTATGGAGTCGTT     | AY207 | 96.0  | 81.5  |
| MGE                         | TP614      | GGAAATCAACGGCATCCAGTT      | CATCCATGCGCTTTTGTCTCT          | AY25  | 100.0 | 80.4  |
| MGE                         | trfA       | ACGAAGAAATGGTTGTCCTGTTC    | CGTCAGCTTGCGGTACTTCTC          | AY358 | 78.0  | 66.3  |
| <b>Insertional sequence</b> |            |                            |                                |       |       |       |
| MGE                         | IS1111     | GTCTTAAGGTGGGCTGCGTG       | CCCCGAATCTCATTGATCAGC          | AY376 | 0.0   | 1.1   |
| MGE                         | IS1133     | GCAGCGTCGGGTTGGA           | ACGCGTTCGAACAACCTGTAATG        | AY383 | 82.0  | 2.2   |
| MGE                         | ISAb3      | TCAGAGGCAGCGGTATACGA       | GGTTGATTCAAGTAAAGTACGTAAAACCTT | AY371 | 100.0 | 91.3  |
| MGE                         | ISEfm1     | AGGTGTCCATGACGTGAAAGTG     | TCCTTTGTCCCCTAGGATATTGG        | AY372 | 92.0  | 5.4   |
| MGE                         | ISPps      | CACACTGCAAAAACGCATCCT      | TGTCTTTGGCGTCACAGTTCTC         | AY369 | 100.0 | 95.7  |
| MGE                         | ISSm2      | TGGATCGACCGGTTCCAT         | GCTGACCGAGCTGTCCATGT           | AY370 | 100.0 | 100.0 |
| MGE                         | orf37-IS26 | GCCGGGTTGTGCAAATAGAC       | TGGCAATCTGTCGCTGCTG            | AY365 | 50.0  | 0.0   |
| MGE                         | orf39-IS26 | GCGCGTCGAGCATCAATAG        | CAGTTGTGCTGCTGGTGGTC           | AY366 | 82.0  | 5.4   |
| MGE                         | Tn5        | CAGCATAAAAAATCCCGACAACA    | CCCCGCAACAGACATACGT            | AY384 | 48.0  | 0.0   |
| <b>Plasmid-associated</b>   |            |                            |                                |       |       |       |
| MGE                         | IncN_rep   | AGTTCACCACCTACTCGCTCCG     | CAAGTTCTTCTGTTGGGATTCCG        | AY340 | n.a.  | n.a.  |
| MGE                         | IncN_oriT  | TTGGGCTTCATAGTACCC         | GTGTGATAGCGTGATTTATGC          | AY341 | n.a.  | n.a.  |
| MGE                         | IncP_oriT  | CAGCCTCGCAGAGCAGGAT        | CAGCCGGGCAGGATAGGTGAAGT        | AY342 | n.a.  | n.a.  |
| MGE                         | IncQ_oriT  | TTCGCGCTCGTTGTTCTTCGAGC    | GCCGTTAGGCCAGTTTCTCG           | AY343 | n.a.  | n.a.  |
| MGE                         | IncW_trwAB | AGCGTATGAAGCCCCTGAAGGG     | AAAGATAAGCGGCAGGACAATAACG      | AY344 | n.a.  | n.a.  |
| MGE                         | PAMBL      | CAGGCTCTTAATGTGATA         | TTATGCTCAATACTCGTG             | AY377 | n.a.  | n.a.  |
| MGE                         | pAKD1      | GGTAAGATTACCGATAAACT       | GTTCGTGAAGAAGATGTA             | AY380 | n.a.  | n.a.  |
| MGE                         | pNI105     | CGTAAGGATGTTTACAC          | CTCAACCGTTCTAGGATT             | AY379 | n.a.  | n.a.  |
| MGE                         | repA       | CCCCAGGACTTGCGAGCG         | GAGGCATGCACGCCGACCA            | AY378 | n.a.  | n.a.  |

n.a. not available

Note: Plasmid-associated genes, due to their low representativeness, were excluded from the analyses.

**Table S3. Consumption of antibacterials for systemic use (ATC group J01) in the community (primary care sector) in different European countries from 2005 to 2015 (see also Fig. 1), defined as daily dose per 1000 inhabitants and per day.**

| Year                    | Portugal<br>(PT) | Spain<br>(ES) | Cyprus*<br>(CYP) | Ireland<br>(IL) | Germany<br>(DE) | Finland<br>(FI) | Norway<br>(NO) |
|-------------------------|------------------|---------------|------------------|-----------------|-----------------|-----------------|----------------|
| 2005                    | 24.5             | 19.3          | -                | 20.5            | 14.6            | 18.1            | 16.8           |
| 2006                    | 22.7             | 18.7          | 31.9             | 21.2            | 13.6            | 17.4            | 14.8           |
| 2007                    | –                | 19.9          | 33.9             | 22.9            | 14.5            | 18.3            | 15.5           |
| 2008                    | 22.7             | 19.8          | 33.7             | 22.5            | 14.6            | 17.8            | 15.6           |
| 2009                    | 22.9             | 19.7          | 34.4             | 20.8            | 14.9            | 17.9            | 15.2           |
| 2010                    | 22.4             | 20.3          | 31.0             | 20.3            | 14.5            | 18.5            | 15.8           |
| 2011                    | 23.2             | 20.9          | 32.0             | 22.6            | 14.1            | 20.1            | 16.5           |
| 2012                    | 22.7             | 19.7          | 29.7             | 23.0            | 14.9            | 19.5            | 16.9           |
| 2013                    | 19.6             | 20.3          | 28.2             | 23.8            | 15.8            | 18.3            | 16.2           |
| 2014                    | 20.3             | 21.6          | 26.1             | 23.1            | 14.6            | 18.1            | 15.9           |
| 2015                    | 21.3             | 22.2          | 31.1             | 25.6            | 14.4            | 17.2            | 15.8           |
| Mean value<br>2005-2015 | 22.2             | 20.2          | 31.2             | 22.4            | 14.6            | 18.3            | 15.9           |

\* includes total care cases only

Source: <https://ecdc.europa.eu/en/antimicrobial-consumption/database/trend-country>

**Table S4. Characterization of the UWTPs examined in this study, in terms of dimension, geographic conditions, treatment, and microbiological indicators.**

| UWTP | Treatment (sT or tT) | Avg. air annual temp. (°C) | Wastewater temp. (°C)<br>Spring (S)<br>Autumn (A) | Population equivalent | N.° of hospitals/hospital beds in the area | BOD5 (Effluent) | COD (Effluent) | HRT (hours) | SRT (days) | DWF (m <sup>3</sup> /day) |
|------|----------------------|----------------------------|---------------------------------------------------|-----------------------|--------------------------------------------|-----------------|----------------|-------------|------------|---------------------------|
| PT1* | sT                   | 15                         | S: n.a.<br>A: 21                                  | 160 000               | n.a./n.a.                                  | 15–25           | 78–107         | 11          | 2.8-5.3    | 21 241-21 884             |
| PT2  | sT                   | 15                         | S: 19<br>A: 20-24                                 | 150 094               | 1/1120                                     | 5.0–11          | 34–50          | n.a.        | n.a.       | 32 060-34 005             |
| PT3  | sT + UV disinfection | 15                         | S: 18                                             | 173 839               | n.a./n.a.                                  | 8.0             | 29             | n.a.        | 12         | n.a.-23 793               |
| ES1  | sT                   | 15                         | S: 18<br>A: 24                                    | 200 000               | 3/400                                      | 1.4–7.9         | n.a.           | 24          | 18         | 43 000                    |
| CYP1 | tT                   | 20                         | S: 22<br>A: 26-30                                 | 151 000               | n.a./n.a.                                  | 4.0–12          | 23–33          | 25          | 8.9        | 18 000-21 480             |
| CYP2 | tT                   | 20                         | S: 21-23<br>A: 28-31                              | 30 000                | n.a./n.a.                                  | 2.0–26          | 18–42          | 18          | 30         | 4 000                     |
| IL1  | tT                   | 10                         | n.a.                                              | 2 000 – 100 000       | n.a.                                       | n.a.            | n.a.           | n.a.        | n.a.       | 1 000 – 30 000            |
| IL2  | tT                   | 10                         | n.a.                                              | 2 000 – 100 000       | n.a.                                       | n.a.            | n.a.           | n.a.        | n.a.       | 1 000 – 30 000            |
| DE1  | sT                   | 9                          | S: 11-12<br>A: 17-19                              | 440 000               | 3/2162                                     | 2.0             | 12–17          | 12          | 12         | 114 221-126 317           |
| DE2  | sT                   | 11                         | n.a.                                              | 650 000               | 8/5048                                     | <3.0–5.0        | 20–34          | 29          | 14         | 137 000-140 600           |
| FI1  | tT                   | 6                          | S: 12<br>A: 17                                    | 800 000               | 11/2492                                    | 3.9–4.4         | 41–52          | 20          | 14         | 270 684-278 082           |
| FI2  | sT                   | 6                          | S: 10<br>A: 16                                    | 310 000               | 2/812                                      | 3.7–5.4         | 26–40          | 19          | 13         | 100 273-102 191           |
| NO1  | sT                   | 7                          | S: 8<br>A: 15-16                                  | 739 000               | 4/2650                                     | 6.0–18          | 41–54          | 3.5         | 25-37      | 250 959-272 877           |

sT, secondary treatment; tT, tertiary treatment;

Avg. temp., annual average temperature for the region according to the timeanddate.com ([www.timeanddate.com](http://www.timeanddate.com)).

HRT, hydraulic residence time; SRT, sludge residence time; DWF, daily water flow; n.a. – not available.

\*Soon after this study, PT1 was temporarily closed for improvement restoration.

**Table S4. (continuation)**

| UWTP        | Faecal coliforms counts (log CFU's/mL) in final effluent |                         |                          |                           | Enterococci counts (log CFU's/mL) in final effluent |                           |                            |                           |
|-------------|----------------------------------------------------------|-------------------------|--------------------------|---------------------------|-----------------------------------------------------|---------------------------|----------------------------|---------------------------|
|             |                                                          | AML <sub>R</sub>        | TET <sub>R</sub>         | CIP <sub>R</sub>          |                                                     | AML <sub>R</sub>          | TET <sub>R</sub>           | CIP <sub>R</sub>          |
| <b>PT1</b>  | 6.22±0.56 <sup>a</sup>                                   | 5.91±0.43 <sup>a</sup>  | 4.95±0.46 <sup>a</sup>   | 5.12±0.40 <sup>a</sup>    | 5.01±0.56 <sup>a</sup>                              | 2.87±0.50 <sup>a</sup>    | 4.32±0.58 <sup>a</sup>     | 3.41±0.38 <sup>a</sup>    |
| <b>PT2</b>  | 5.13±0.44 <sup>ab</sup>                                  | 4.81±0.51 <sup>ab</sup> | 3.93±0.35 <sup>ab</sup>  | 4.33±0.51 <sup>ab</sup>   | 4.17±0.61 <sup>ab</sup>                             | 2.06±0.75 <sup>abcd</sup> | 3.37±0.40 <sup>ab</sup>    | 2.44±0.68 <sup>abc</sup>  |
| <b>PT3</b>  | 3.61±0.18 <sup>cd</sup>                                  | 3.09±0.03 <sup>cd</sup> | 2.45±0.20 <sup>bcd</sup> | 2.67±0.11 <sup>bcd</sup>  | 2.91±0.19 <sup>bc</sup>                             | 0.86±0.06 <sup>bcd</sup>  | 2.14±0.23 <sup>bcd</sup>   | 1.43±0.06 <sup>abcd</sup> |
| <b>ES1</b>  | 4.87±0.62 <sup>bc</sup>                                  | 4.36±0.80 <sup>bc</sup> | 4.10±1.02 <sup>ab</sup>  | 4.12±0.63 <sup>abcd</sup> | 3.85±0.36 <sup>ab</sup>                             | 3.45±0.16 <sup>ab</sup>   | 2.79±0.34 <sup>bcdef</sup> | 3.06±0.48 <sup>abcd</sup> |
| <b>CYP1</b> | 3.00±1.71 <sup>de</sup>                                  | 2.13±0.85 <sup>de</sup> | 2.11±1.61 <sup>cde</sup> | 2.45±1.62 <sup>cde</sup>  | 1.77±1.38 <sup>cd</sup>                             | 1.29±0.11 <sup>cd</sup>   | 1.08±1.59 <sup>def</sup>   | 1.45±1.38 <sup>bcd</sup>  |
| <b>CYP2</b> | 2.31±0.61 <sup>de</sup>                                  | 1.61±0.29 <sup>ef</sup> | 1.08±0.72 <sup>de</sup>  | 1.52±0.68 <sup>de</sup>   | 0.59±0.40 <sup>d</sup>                              | ≤ -2.7                    | -0.30±0.32 <sup>f</sup>    | 0.18±0.44 <sup>d</sup>    |
| <b>IL1</b>  | 4.50±0.25 <sup>bc</sup>                                  | 4.10±0.11 <sup>bc</sup> | 3.08±0.39 <sup>abc</sup> | 3.45±0.40 <sup>abcd</sup> | 3.17±0.26 <sup>b</sup>                              | ≤ 0.00                    | 2.21±0.13 <sup>bcdef</sup> | ≤ 0.00                    |
| <b>IL2</b>  | 4.63±0.36 <sup>bc</sup>                                  | 4.27±0.24 <sup>bc</sup> | 3.14±0.42 <sup>ab</sup>  | 3.51±0.47 <sup>abc</sup>  | 3.33±0.27 <sup>ab</sup>                             | < 0.00                    | 2.35±0.25 <sup>cdef</sup>  | ≤ 0.00                    |
| <b>DE1</b>  | 1.54±0.82 <sup>ef</sup>                                  | 0.95±0.46 <sup>f</sup>  | 0.52±0.33 <sup>e</sup>   | 0.75±0.62 <sup>e</sup>    | 1.55±0.01 <sup>d</sup>                              | 0.30±0.06 <sup>cd</sup>   | 0.75±0.00 <sup>ef</sup>    | ≤ -2.00                   |
| <b>DE2</b>  | 5.05±0.31 <sup>abc</sup>                                 | 4.86±0.24 <sup>ab</sup> | 3.85±0.33 <sup>bc</sup>  | 3.72±0.49 <sup>bcd</sup>  | 4.91±0.31 <sup>ab</sup>                             | 3.63±0.25 <sup>ab</sup>   | 3.86±0.23 <sup>abc</sup>   | 4.30±0.18 <sup>ab</sup>   |
| <b>FI1</b>  | n.a.                                                     | n.a.                    | n.a.                     | n.a.                      | n.a.                                                | n.a.                      | n.a.                       | n.a.                      |
| <b>FI2</b>  | n.a.                                                     | n.a.                    | n.a.                     | n.a.                      | n.a.                                                | n.a.                      | n.a.                       | n.a.                      |
| <b>NO1</b>  | ≤ 2.00                                                   | ≤ 1.00                  | ≤ 1.00                   | ≤ 1.00                    | 3.49±0.60 <sup>bc</sup>                             | 2.80±0.32 <sup>abc</sup>  | ≤ 0.00                     | ≤ 0.00                    |

a-f: significant differences among wastewater treatment plants, determined based on ANOVA and the post-hoc Tuckey test ( $p < 0.01$ ).

AML<sub>R</sub>, amoxicillin resistant; TET<sub>R</sub>, tetracycline resistant; CIP<sub>R</sub>, ciprofloxacin resistant;

n.a. not available
